# Supplementary material
Source: PubMed Central journal article supplement (PMC7082106)
Supplement: supp_8.1.E191_2019-0114-1-at.pdf [file supp_8.1.E191_2019-0114-1-at.pdf]

Appendix 1 (as supplied by the authors): Supplemental tables

| Supplemental Table S1: Use of cancer-related medication and mean (95% CI in parentheses) cancer-related medication costs in 1 year after diagnosis among cancer patients diagnosed between January 1, 2010 and December 31, 2015, by cancer subtype and cancer stage at the time of diagnosis |                            |                                     |                         |                         |                         |                         |                         |                        |
|-----------------------------------------------------------------------------------------------------------------------------------------------------------------------------------------------------------------------------------------------------------------------------------------------|----------------------------|-------------------------------------|-------------------------|-------------------------|-------------------------|-------------------------|-------------------------|------------------------|
| Cancer site                                                                                                                                                                                                                                                                                   | Cancer subtype             | Measures                            | Overall                 | Stage I                 | Stage II                | Stage III               | Stage IV                | Unknown Stage          |
| Breast †                                                                                                                                                                                                                                                                                      | Hormone Receptor + HER 2 + | No. of patients                     | 4,010                   | 1,219                   | 1,708                   | 838                     | 232                     | 13                     |
|                                                                                                                                                                                                                                                                                               |                            | No. (%) used chemotherapy           | 3,751 (93.5%)           | 1,089 (89.3%)           | 1,630 (95.4%)           | 813 (97.0%)             | 207 (89.2%)             | 12 (92.3%)             |
|                                                                                                                                                                                                                                                                                               |                            | Mean (95% CI) of chemotherapy cost* | 30,453 (29,828, 31,077) | 28,075 (27,036, 29,114) | 29,485 (28,677, 30,293) | 32,399 (31,177, 33,620) | 43,801 (38,327, 49,274) | 15,601 (5,305, 25,896) |
|                                                                                                                                                                                                                                                                                               | Hormone Receptor + HER 2 - | No. of patients                     | 29,241                  | 13,920                  | 10,876                  | 3,441                   | 921                     | 83                     |
|                                                                                                                                                                                                                                                                                               |                            | No. (%) used chemotherapy           | 21,541 (73.7%)          | 8,324 (59.8%)           | 9,103 (83.7%)           | 3,271 (95.1%)           | 779 (84.6%)             | 64 (77.1%)             |
|                                                                                                                                                                                                                                                                                               |                            | Mean (95% CI) of chemotherapy cost* | 2,971 (2,899, 3,044)    | 1,464 (1,381, 1,548)    | 3,568 (3,452, 3,683)    | 5,267 (5,042, 5,492)    | 2,633 (2,151, 3,115)    | 928 (655, 1,201)       |
|                                                                                                                                                                                                                                                                                               | Hormone Receptor - HER 2 + | No. of patients                     | 1,954                   | 498                     | 815                     | 483                     | 151                     | 7                      |
|                                                                                                                                                                                                                                                                                               |                            | No. (%) used chemotherapy           | 1,807 (92.5%)           | 417 (83.7%)             | 779 (95.6%)             | 465 (96.3%)             | 139 (92.1%)             | 7 (100.0%)             |
|                                                                                                                                                                                                                                                                                               |                            | Mean (95% CI) of chemotherapy cost* | 32,383 (31,463, 33,303) | 27,848 (26,276, 29,421) | 31,484 (30,345, 32,624) | 33,476 (31,768, 35,185) | 47,987 (41,800, 54,175) | 19,928 (3,604, 36,251) |
|                                                                                                                                                                                                                                                                                               | Hormone Receptor - HER 2 - | No. of patients                     | 4,249                   | 1,229                   | 2,117                   | 716                     | 180                     | 7                      |
|                                                                                                                                                                                                                                                                                               |                            | No. (%) used chemotherapy           | 3,872 (91.1%)           | 1,045 (85.0%)           | 1,979 (93.5%)           | 688 (96.1%)             | 154 (85.6%)             | 6 (85.7%)              |
|                                                                                                                                                                                                                                                                                               |                            | Mean (95% CI) of chemotherapy cost* | 5,329 (5,122, 5,536)    | 4,532 (4,174, 4,890)    | 5,496 (5,211, 5,781)    | 6,550 (5,968, 7,133)    | 3,230 (2,456, 4,003)    | 2,915 (463, 5,367)     |
| Colorectal                                                                                                                                                                                                                                                                                    | Colon                      | No. of patients                     | 25,312                  | 5,140                   | 6,754                   | 6,635                   | 4,734                   | 2,049                  |
|                                                                                                                                                                                                                                                                                               |                            | No. (%) used chemotherapy           | 18,367 (72.6%)          | 2,970 (57.8%)           | 4,619 (68.4%)           | 5,838 (88.0%)           | 3,854 (81.4%)           | 1,086 (53.0%)          |

| <b>Supplemental Table S1: Use of cancer-related medication and mean (95% CI in parentheses) cancer-related medication costs in 1 year after diagnosis among cancer patients diagnosed between January 1, 2010 and December 31, 2015, by cancer subtype and cancer stage at the time of diagnosis</b> |                       |                                     |                         |                         |                         |                            |                            |                         |
|------------------------------------------------------------------------------------------------------------------------------------------------------------------------------------------------------------------------------------------------------------------------------------------------------|-----------------------|-------------------------------------|-------------------------|-------------------------|-------------------------|----------------------------|----------------------------|-------------------------|
| <b>Cancer site</b>                                                                                                                                                                                                                                                                                   | <b>Cancer subtype</b> | <b>Measures</b>                     | <b>Overall</b>          | <b>Stage I</b>          | <b>Stage II</b>         | <b>Stage III</b>           | <b>Stage IV</b>            | <b>Unknown Stage</b>    |
|                                                                                                                                                                                                                                                                                                      | Rectal                | Mean (95% CI) of chemotherapy cost* | 6,505<br>(6,348, 6,662) | 531<br>(422, 640)       | 2,170<br>(2,000, 2,341) | 10,326<br>(10,043, 10,609) | 11,342<br>(10,887, 11,796) | 3,566<br>(3,037, 4,095) |
|                                                                                                                                                                                                                                                                                                      |                       | No. of patients                     | 12,796                  | 3,129                   | 2,370                   | 4,120                      | 2,114                      | 1,063                   |
|                                                                                                                                                                                                                                                                                                      |                       | No. (%) used chemotherapy           | 9,382<br>(73.3%)        | 1,705<br>(54.5%)        | 1,802<br>(76.0%)        | 3,644<br>(88.4%)           | 1,780<br>(84.2%)           | 451<br>(42.4%)          |
|                                                                                                                                                                                                                                                                                                      |                       | Mean (95% CI) of chemotherapy cost* | 6,693<br>(6,500, 6,886) | 1,226<br>(1,021, 1,431) | 4,337<br>(4,014, 4,660) | 8,534<br>(8,251, 8,816)    | 11,659<br>(11,040, 12,277) | 2,305<br>(1,705, 2,906) |
| Lung                                                                                                                                                                                                                                                                                                 | Non-small cell        | No. of patients                     | 30,091                  | 5,959                   | 2,715                   | 5,858                      | 14,531                     | 1,028                   |
|                                                                                                                                                                                                                                                                                                      |                       | No. (%) used chemotherapy           | 23,831<br>(79.2%)       | 4,346<br>(72.9%)        | 2,340<br>(86.2%)        | 5,061<br>(86.4%)           | 11,392<br>(78.4%)          | 692<br>(67.3%)          |
|                                                                                                                                                                                                                                                                                                      |                       | Mean (95% CI) of chemotherapy cost* | 3,051<br>(2,955, 3,148) | 579<br>(512, 647)       | 1,364<br>(1,222, 1,506) | 2,325<br>(2,165, 2,486)    | 4,712<br>(4,535, 4,889)    | 2,241<br>(1,734, 2,749) |
|                                                                                                                                                                                                                                                                                                      | Small cell            | No. of patients                     | 4,718                   | 145                     | 140                     | 1,131                      | 3,183                      | 119                     |
|                                                                                                                                                                                                                                                                                                      |                       | No. (%) used chemotherapy           | 3,842<br>(81.4%)        | 124<br>(85.5%)          | 129<br>(92.1%)          | 989<br>(87.4%)             | 2,518<br>(79.1%)           | 82 (68.9%)              |
|                                                                                                                                                                                                                                                                                                      |                       | Mean (95% CI) of chemotherapy cost* | 1,965<br>(1,882, 2,048) | 1,769<br>(1,404, 2,134) | 2,334<br>(1,855, 2,813) | 2,117<br>(1,960, 2,275)    | 1,921<br>(1,816, 2,027)    | 1,181<br>(835, 1,528)   |
| Prostate                                                                                                                                                                                                                                                                                             |                       | No. of patients                     | 45,258                  | 10,154                  | 22,103                  | 5,664                      | 4,058                      | 3,279                   |
|                                                                                                                                                                                                                                                                                                      |                       | No. (%) used chemotherapy           | 22,599<br>(49.9%)       | 3,231<br>(31.8%)        | 11,763<br>(53.2%)       | 2,798<br>(49.4%)           | 3,276<br>(80.7%)           | 1,531<br>(46.7%)        |
|                                                                                                                                                                                                                                                                                                      |                       | Mean (95% CI) of chemotherapy cost* | 1,211<br>(1,175, 1,247) | 268<br>(239, 296)       | 966<br>(932, 1,000)     | 825<br>(763, 888)          | 3,236<br>(3,060, 3,413)    | 1,461<br>(1,303, 1,620) |

\*: Among those who had a non \$0 chemotherapy medication cost.

†: Results for those with missing Hormone Receptor information or missing HER 2 information were not included.

**Supplemental Table S2: Use of radiation treatment and mean (95% CI in parentheses) radiation treatment costs in 1 year after diagnosis among cancer patients diagnosed between January 1, 2010 and December 31, 2015, by cancer subtype and cancer stage at the time of diagnosis**

| Cancer site | Cancer subtype             | Measures                         | Overall                 | Stage I                 | Stage II                | Stage III               | Stage IV               | Unknown Stage          |
|-------------|----------------------------|----------------------------------|-------------------------|-------------------------|-------------------------|-------------------------|------------------------|------------------------|
| Breast†     | Hormone Receptor + HER 2 + | No. of patients                  | 4,010                   | 1,219                   | 1,708                   | 838                     | 232                    | 13                     |
|             |                            | No. (%) used radiation           | 3,430 (85.5%)           | 1,027 (84.2%)           | 1,470 (86.1%)           | 780 (93.1%)             | 147 (63.4%)            | 6 (46.2%)              |
|             |                            | Mean (95% CI) of radiation cost* | 19,600 (19,198, 20,002) | 16,618 (15,978, 17,259) | 20,464 (19,856, 21,072) | 23,866 (23,024, 24,708) | 9,303 (7,333, 11,274)  | 16,132 (9,049, 23,216) |
|             | Hormone Receptor + HER 2 - | No. of patients                  | 29,241                  | 13,920                  | 10,876                  | 3,441                   | 921                    | 83                     |
|             |                            | No. (%) used radiation           | 24,532 (83.9%)          | 11,751 (84.4%)          | 9,049 (83.2%)           | 3,095 (89.9%)           | 615 (66.8%)            | 22 (26.5%)             |
|             |                            | Mean (95% CI) of radiation cost* | 18,343 (18,200, 18,485) | 16,438 (16,262, 16,615) | 19,724 (19,476, 19,972) | 23,744 (23,310, 24,178) | 7,548 (6,702, 8,394)   | 9,088 (4,630, 13,546)  |
|             | Hormone Receptor - HER 2 + | No. of patients                  | 1,954                   | 498                     | 815                     | 483                     | 151                    | 7                      |
|             |                            | No. (%) used radiation           | 1,666 (85.3%)           | 397 (79.7%)             | 718 (88.1%)             | 452 (93.6%)             | 96 (63.6%)             | 3 (42.9%)              |
|             |                            | Mean (95% CI) of radiation cost* | 19,872 (19,272, 20,473) | 15,689 (14,560, 16,818) | 20,697 (19,823, 21,571) | 24,149 (23,007, 25,291) | 11,089 (8,727, 13,451) | 12,751 (284, 25,219)   |
|             | Hormone Receptor - HER 2 - | No. of patients                  | 4,249                   | 1,229                   | 2,117                   | 716                     | 180                    | 7                      |
|             |                            | No. (%) used radiation           | 3,691 (86.9%)           | 1,067 (86.8%)           | 1,844 (87.1%)           | 649 (90.6%)             | 125 (69.4%)            | 6 (85.7%)              |
|             |                            | Mean (95% CI) of radiation cost* | 19,616 (19,228, 20,004) | 17,375 (16,759, 17,992) | 20,013 (19,463, 20,562) | 23,692 (22,739, 24,646) | 11,771 (9,107, 14,436) | 18,563 (7,004, 30,122) |
| Colorectal  | Colon                      | No. of patients                  | 25,312                  | 5,140                   | 6,754                   | 6,635                   | 4,734                  | 2,049                  |
|             |                            | No. (%) used radiation           | 1,722 (6.8%)            | 90 (1.8%)               | 343 (5.1%)              | 530 (8.0%)              | 642 (13.6%)            | 117 (5.7%)             |
|             |                            | Mean (95% CI) of radiation cost* | 6,508 (6,022, 6,994)    | 6,145 (3,825, 8,465)    | 8,527 (7,284, 9,770)    | 7,799 (6,781, 8,818)    | 4,068 (3,554, 4,583)   | 8,401 (6,460, 10,343)  |
|             | Rectal                     | No. of patients                  | 12,796                  | 3,129                   | 2,370                   | 4,120                   | 2,114                  | 1,063                  |

| <b>Supplemental Table S2: Use of radiation treatment and mean (95% CI in parentheses) radiation treatment costs in 1 year after diagnosis among cancer patients diagnosed between January 1, 2010 and December 31, 2015, by cancer subtype and cancer stage at the time of diagnosis</b> |                       |                                         |                            |                            |                            |                            |                            |                            |
|------------------------------------------------------------------------------------------------------------------------------------------------------------------------------------------------------------------------------------------------------------------------------------------|-----------------------|-----------------------------------------|----------------------------|----------------------------|----------------------------|----------------------------|----------------------------|----------------------------|
| <b>Cancer site</b>                                                                                                                                                                                                                                                                       | <b>Cancer subtype</b> | <b>Measures</b>                         | <b>Overall</b>             | <b>Stage I</b>             | <b>Stage II</b>            | <b>Stage III</b>           | <b>Stage IV</b>            | <b>Unknown Stage</b>       |
|                                                                                                                                                                                                                                                                                          |                       | <b>No. (%) used radiation</b>           | 7,257<br>(56.7%)           | 962<br>(30.7%)             | 1,636<br>(69.0%)           | 3,273<br>(79.4%)           | 1,235<br>(58.4%)           | 151<br>(14.2%)             |
|                                                                                                                                                                                                                                                                                          |                       | <b>Mean (95% CI) of radiation cost*</b> | 17,235<br>(16,929, 17,540) | 11,030<br>(10,183, 11,878) | 19,260<br>(18,629, 19,891) | 20,643<br>(20,222, 21,063) | 10,719<br>(10,063, 11,375) | 14,236<br>(11,876, 16,596) |
| <b>Lung</b>                                                                                                                                                                                                                                                                              | <b>Non-small cell</b> | <b>No. of patients</b>                  | 30,091                     | 5,959                      | 2,715                      | 5,858                      | 14,531                     | 1,028                      |
|                                                                                                                                                                                                                                                                                          |                       | <b>No. (%) used radiation</b>           | 19,603<br>(65.1%)          | 2,208<br>(37.1%)           | 1,403<br>(51.7%)           | 4,876<br>(83.2%)           | 10,750<br>(74.0%)          | 366<br>(35.6%)             |
|                                                                                                                                                                                                                                                                                          |                       | <b>Mean (95% CI) of radiation cost*</b> | 10,470<br>(10,311, 10,629) | 7,602<br>(7,237, 7,967)    | 12,418<br>(11,715, 13,122) | 17,314<br>(16,903, 17,724) | 7,812<br>(7,660, 7,964)    | 7,202<br>(6,258, 8,145)    |
|                                                                                                                                                                                                                                                                                          | <b>Small cell</b>     | <b>No. of patients</b>                  | 4,718                      | 145                        | 140                        | 1,131                      | 3,183                      | 119                        |
|                                                                                                                                                                                                                                                                                          |                       | <b>No. (%) used radiation</b>           | 3,555<br>(75.3%)           | 122<br>(84.1%)             | 124<br>(88.6%)             | 988<br>(87.4%)             | 2,255<br>(70.8%)           | 66 (55.5%)                 |
|                                                                                                                                                                                                                                                                                          |                       | <b>Mean (95% CI) of radiation cost*</b> | 12,733<br>(12,329, 13,138) | 14,855<br>(12,574, 17,135) | 19,603<br>(17,283, 21,923) | 20,143<br>(19,244, 21,043) | 9,002<br>(8,622, 9,381)    | 12,485<br>(9,789, 15,181)  |
| <b>Prostate</b>                                                                                                                                                                                                                                                                          |                       | <b>No. of patients</b>                  | 45,258                     | 10,154                     | 22,103                     | 5,664                      | 4,058                      | 3,279                      |
|                                                                                                                                                                                                                                                                                          |                       | <b>No. (%) used radiation</b>           | 23,207<br>(51.3%)          | 3,228<br>(31.8%)           | 13,433<br>(60.8%)          | 3,701<br>(65.3%)           | 2,478<br>(61.1%)           | 367<br>(11.2%)             |
|                                                                                                                                                                                                                                                                                          |                       | <b>Mean (95% CI) of radiation cost*</b> | 16,887<br>(16,648, 17,125) | 6,467<br>(6,006, 6,928)    | 20,543<br>(20,219, 20,867) | 17,765<br>(17,168, 18,362) | 10,264<br>(9,717, 10,812)  | 10,564<br>(8,985, 12,142)  |

\*: Among those who had a non \$0 radiation treatment cost.

†: Results for those with missing Hormone Receptor information or missing HER 2 information were not included.

**Supplemental Table S3: Use of cancer-related medication and mean (95% CI in parentheses) cancer-related medication costs in 1 year after diagnosis among cancer patients diagnosed between January 1, 2010 and December 31, 2015 *and who survived for 2 years or more*, by cancer stage at the time of diagnosis.** This analysis was performed to exclude possible end-of-life chemotherapy costs.

| Cancer site | Measures                          | Overall                 | Stage I                 | Stage II                | Stage III                  | Stage IV                   | Unknown Stage           |
|-------------|-----------------------------------|-------------------------|-------------------------|-------------------------|----------------------------|----------------------------|-------------------------|
| Breast      | No. of patients                   | 46,584                  | 20,373                  | 17,765                  | 5,979                      | 1,328                      | 1,139                   |
|             | No. (%) used medication           | 35,560<br>(76.3%)       | 12,793<br>(62.8%)       | 15,316<br>(86.2%)       | 5,700<br>(95.3%)           | 1,149<br>(86.5%)           | 602 (52.9%)             |
|             | Mean (95% CI) of medication cost* | 8,454<br>(8,303, 8,606) | 5,505<br>(5,299, 5,711) | 8,731<br>(8,519, 8,943) | 12,773<br>(12,353, 13,194) | 17,557<br>(15,773, 19,342) | 5,807<br>(4,706, 6,907) |
| Colorectal  | No. of patients                   | 28,137                  | 7,581                   | 7,848                   | 8,725                      | 2,184                      | 1,799                   |
|             | No. (%) used medication           | 20,456<br>(72.7%)       | 4,198<br>(55.4%)        | 5,575<br>(71.0%)        | 7,869<br>(90.2%)           | 1,992<br>(91.2%)           | 822 (45.7%)             |
|             | Mean (95% CI) of medication cost* | 6,917<br>(6,777, 7,057) | 779 (675, 883)          | 2,961<br>(2,791, 3,131) | 10,557<br>(10,333, 10,782) | 17,551<br>(16,940, 18,162) | 4,474<br>(3,811, 5,137) |
| Lung        | No. of patients                   | 11,303                  | 4,905                   | 1,733                   | 2,453                      | 1,889                      | 323                     |
|             | No. (%) used medication           | 8,893<br>(78.7%)        | 3,477<br>(70.9%)        | 1,505<br>(86.8%)        | 2,146<br>(87.5%)           | 1,561<br>(82.6%)           | 204 (63.2%)             |
|             | Mean (95% CI) of medication cost* | 3,117<br>(2,942, 3,292) | 518<br>(448, 588)       | 1,394<br>(1,237, 1,552) | 2,740<br>(2,451, 3,029)    | 11,151<br>(10,398, 11,903) | 2,592<br>(1,473, 3,712) |
| Prostate    | No. of patients                   | 42,002                  | 9,919                   | 21,235                  | 5,525                      | 2,546                      | 2,777                   |
|             | No. (%) used medication           | 20,012<br>(47.6%)       | 3,075<br>(31.0%)        | 11,090<br>(52.2%)       | 2,691<br>(48.7%)           | 1,946<br>(76.4%)           | 1,210<br>(43.6%)        |
|             | Mean (95% CI) of medication cost* | 1,031<br>(996, 1,065)   | 260<br>(231, 288)       | 926<br>(892, 960)       | 782<br>(720, 844)          | 2,986<br>(2,750, 3,222)    | 1,355<br>(1,186, 1,524) |

\*: Among those who had used chemotherapy medication.

| <b>Supplemental Table S4: Use of radiation treatment and mean (95% CI in parentheses) radiation treatment costs in 1 year after diagnosis among cancer patients diagnosed between January 1, 2010 and December 31, 2015 and who survived for 2 years or more, by cancer stage at the time of diagnosis</b> |                                  |                         |                         |                         |                         |                         |                         |
|------------------------------------------------------------------------------------------------------------------------------------------------------------------------------------------------------------------------------------------------------------------------------------------------------------|----------------------------------|-------------------------|-------------------------|-------------------------|-------------------------|-------------------------|-------------------------|
| Cancer site                                                                                                                                                                                                                                                                                                | Measures                         | Overall                 | Stage I                 | Stage II                | Stage III               | Stage IV                | Unknown Stage           |
| <b>Breast</b>                                                                                                                                                                                                                                                                                              | No. of patients                  | 46,584                  | 20,373                  | 17,765                  | 5,979                   | 1,328                   | 1,139                   |
|                                                                                                                                                                                                                                                                                                            | No. (%) used radiation           | 38,721 (83.1%)          | 17,001 (83.4%)          | 14,836 (83.5%)          | 5,485 (91.7%)           | 870 (65.5%)             | 529 (46.4%)             |
|                                                                                                                                                                                                                                                                                                            | Mean (95% CI) of radiation cost* | 18,857 (18,742, 18,973) | 16,504 (16,355, 16,654) | 20,172 (19,978, 20,365) | 24,618 (24,309, 24,927) | 9,155 (8,346, 9,965)    | 13,851 (12,856, 14,846) |
| <b>Colorectal</b>                                                                                                                                                                                                                                                                                          | No. of patients                  | 28,137                  | 7,581                   | 7,848                   | 8,725                   | 2,184                   | 1,799                   |
|                                                                                                                                                                                                                                                                                                            | No. (%) used radiation           | 6,673 (23.7%)           | 947 (12.5%)             | 1,672 (21.3%)           | 3,199 (36.7%)           | 708 (32.4%)             | 147 (8.2%)              |
|                                                                                                                                                                                                                                                                                                            | Mean (95% CI) of radiation cost* | 17,229 (16,904, 17,554) | 10,761 (9,902, 11,620)  | 18,227 (17,585, 18,869) | 19,857 (19,415, 20,298) | 11,866 (10,918, 12,814) | 16,204 (13,811, 18,597) |
| <b>Lung</b>                                                                                                                                                                                                                                                                                                | No. of patients                  | 11,303                  | 4,905                   | 1,733                   | 2,453                   | 1,889                   | 323                     |
|                                                                                                                                                                                                                                                                                                            | No. (%) used radiation           | 5,866 (51.9%)           | 1,554 (31.7%)           | 748 (43.2%)             | 2,063 (84.1%)           | 1,418 (75.1%)           | 83 (25.7%)              |
|                                                                                                                                                                                                                                                                                                            | Mean (95% CI) of radiation cost* | 14,297 (13,947, 14,647) | 7,715 (7,262, 8,167)    | 12,983 (11,957, 14,008) | 22,227 (21,609, 22,844) | 10,881 (10,318, 11,444) | 10,662 (8,136, 13,188)  |
| <b>Prostate</b>                                                                                                                                                                                                                                                                                            | No. of patients                  | 42,002                  | 9,919                   | 21,235                  | 5,525                   | 2,546                   | 2,777                   |
|                                                                                                                                                                                                                                                                                                            | No. (%) used radiation           | 21,768 (51.8%)          | 3,184 (32.1%)           | 13,056 (61.5%)          | 3,625 (65.6%)           | 1,613 (63.4%)           | 290 (10.4%)             |
|                                                                                                                                                                                                                                                                                                            | Mean (95% CI) of radiation cost* | 17,397 (17,148, 17,646) | 6,466 (6,001, 6,930)    | 20,651 (20,322, 20,979) | 17,836 (17,233, 18,439) | 12,596 (11,822, 13,371) | 12,123 (10,237, 14,008) |

\*: Among those who had a non \$0 radiation cost.
