# Supplementary material
Source: PubMed Central journal article supplement (PMC7082106)
Supplement: supp_8.1.E191_2019-0114-original-submission.pdf [file supp_8.1.E191_2019-0114-original-submission.pdf]

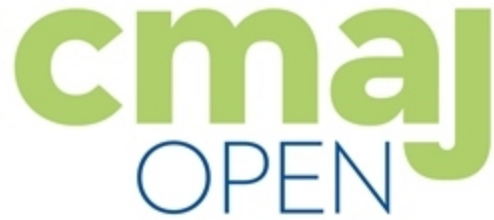

**Health system costs for cancer medications and radiation treatment in the four most common cancers.**

|                               |                                                                                                                                                                                                                                                                                                                                                                                                                                                                                                                                                                                                                                                                                                                                                                                                                                                                                                                                                         |
|-------------------------------|---------------------------------------------------------------------------------------------------------------------------------------------------------------------------------------------------------------------------------------------------------------------------------------------------------------------------------------------------------------------------------------------------------------------------------------------------------------------------------------------------------------------------------------------------------------------------------------------------------------------------------------------------------------------------------------------------------------------------------------------------------------------------------------------------------------------------------------------------------------------------------------------------------------------------------------------------------|
| Journal:                      | <i>CMAJ Open</i>                                                                                                                                                                                                                                                                                                                                                                                                                                                                                                                                                                                                                                                                                                                                                                                                                                                                                                                                        |
| Manuscript ID                 | CMAJOpen-2019-0114                                                                                                                                                                                                                                                                                                                                                                                                                                                                                                                                                                                                                                                                                                                                                                                                                                                                                                                                      |
| Manuscript Type:              | Cohort (retrospective)                                                                                                                                                                                                                                                                                                                                                                                                                                                                                                                                                                                                                                                                                                                                                                                                                                                                                                                                  |
| Date Submitted by the Author: | 25-Jul-2019                                                                                                                                                                                                                                                                                                                                                                                                                                                                                                                                                                                                                                                                                                                                                                                                                                                                                                                                             |
| Complete List of Authors:     | Mittmann, Nicole; Sunnybrook Research Institute<br>Liu, Ning; Institute for Clinical Evaluative Sciences<br>Cheng, Stepanie; Institute for Clinical Evaluative Sciences<br>Seung, Soo Jin<br>Saxena, Farah; Institute for Clinical Evaluative Sciences<br>Look Hong, Nicole; Sunnybrook Health Sciences Centre - Odette CancerCentre, Division of General Surgery<br>Earle, C.C.<br>Cheung, Matthew; Sunnybrook Health Sciences Centre, Odette Cancer Centre; Institute for Clinical Evaluative Sciences,<br>Leighl, Natasha; 6. Princess Margaret Hospital<br>Coburn, Natalie; Sunnybrook Health Sciences Centre - Odette Cancer Centre, Surgical Oncology<br>DeAngelis, Carlo; Sunnybrook Health Sciences Centre, Pharmacy; Sunnybrook Odette Cancer Centre<br>Evans, Bill; McMaster University, Oncology                                                                                                                                             |
| More Detailed Keywords:       |                                                                                                                                                                                                                                                                                                                                                                                                                                                                                                                                                                                                                                                                                                                                                                                                                                                                                                                                                         |
| Keywords:                     | Health economics, Health services research, Oncology                                                                                                                                                                                                                                                                                                                                                                                                                                                                                                                                                                                                                                                                                                                                                                                                                                                                                                    |
| Abstract:                     | <p>Background: Previous costing and resource estimates for cancer have not been robust due to lack of comprehensive data on cancer-related medication and radiation treatment. We calculated mean overall costs per patient per cancer medication and radiation, as well as, by disease and stage in the first year (365 days) after diagnosis for the most prevalent cancers.</p> <p>Methods: A retrospective cohort study design was used to identify population health system resources and costs (\$CAN) for patients diagnosed with breast, colorectal, lung and prostate cancers between January 1, 2010 and December 31, 2015. The overall average cost per patient in 365 days after diagnosis was determined for cancer-related medications and radiation treatment using two novel costing algorithms. The cost by disease, disease subtype and stage were determined.</p> <p>Results: There were 168,316 Ontarians diagnosed with breast</p> |

1  
2  
3  
4  
5  
6  
7  
8  
9  
10  
11  
12  
13  
14  
15  
16  
17  
18  
19  
20  
21  
22  
23  
24  
25  
26  
27  
28  
29  
30  
31  
32  
33  
34  
35  
36  
37  
38  
39  
40  
41  
42  
43  
44  
45  
46  
47  
48  
49  
50  
51  
52  
53  
54  
55  
56  
57  
58  
59  
60

|  |                                                                                                                                                                                                                                                                                                                                                                                                                                                                                                                                                                                                                                                                                                                                                                                               |
|--|-----------------------------------------------------------------------------------------------------------------------------------------------------------------------------------------------------------------------------------------------------------------------------------------------------------------------------------------------------------------------------------------------------------------------------------------------------------------------------------------------------------------------------------------------------------------------------------------------------------------------------------------------------------------------------------------------------------------------------------------------------------------------------------------------|
|  | <p>(N=50,141), colorectal (CRC, N=38,108), lung (N=34,809) and prostate (N=45,258) cancer. Cancer-related medications overall mean costs were \$8,167 (95% CI: 8,023-8,311); \$6,568 (6,446-6,691); \$2,900 (2,816-2,984); and \$1,211 (1,175-1,247) for breast, CRC, lung and prostate, respectively. Mean overall radiation treatment costs were \$18,529 (18,415-18,643); \$15,177 (14,899-15,456); \$10,818 (10,669-10,966); and \$16,887 (16,648-17,125).</p> <p>Interpretation: In general, Stage III and IV were the most expensive disease stages across all four cancers for cancer-related medications and radiation treatment. Our work updates previous costing estimates to help understand resources and costs critical to health system planning in a single payer system.</p> |
|  |                                                                                                                                                                                                                                                                                                                                                                                                                                                                                                                                                                                                                                                                                                                                                                                               |

SCHOLARONE™  
Manuscripts

STROBE Statement—Checklist of items that should be included in reports of *cohort studies*

|                              | Item No | Recommendation                                                                                                                                                                                    | Location in study |
|------------------------------|---------|---------------------------------------------------------------------------------------------------------------------------------------------------------------------------------------------------|-------------------|
| <b>Title and abstract</b>    | 1       | (a) Indicate the study's design with a commonly used term in the title or the abstract                                                                                                            | Page 1            |
|                              |         | (b) Provide in the abstract an informative and balanced summary of what was done and what was found                                                                                               | Page 4            |
| <b>Introduction</b>          |         |                                                                                                                                                                                                   |                   |
| Background/rationale         | 2       | Explain the scientific background and rationale for the investigation being reported                                                                                                              | Page 6            |
| Objectives                   | 3       | State specific objectives, including any prespecified hypotheses                                                                                                                                  | Page 6            |
| <b>Methods</b>               |         |                                                                                                                                                                                                   |                   |
| Study design                 | 4       | Present key elements of study design early in the paper                                                                                                                                           | Pages 7-8         |
| Setting                      | 5       | Describe the setting, locations, and relevant dates, including periods of recruitment, exposure, follow-up, and data collection                                                                   | Page 7            |
| Participants                 | 6       | (a) Give the eligibility criteria, and the sources and methods of selection of participants. Describe methods of follow-up                                                                        | N/A               |
|                              |         | (b) For matched studies, give matching criteria and number of exposed and unexposed                                                                                                               | N/A               |
| Variables                    | 7       | Clearly define all outcomes, exposures, predictors, potential confounders, and effect modifiers. Give diagnostic criteria, if applicable                                                          | Pages 7-9         |
| Data sources/<br>measurement | 8*      | For each variable of interest, give sources of data and details of methods of assessment (measurement). Describe comparability of assessment methods if there is more than one group              | Pages 7-8         |
| Bias                         | 9       | Describe any efforts to address potential sources of bias                                                                                                                                         | N/A               |
| Study size                   | 10      | Explain how the study size was arrived at                                                                                                                                                         | N/A               |
| Quantitative variables       | 11      | Explain how quantitative variables were handled in the analyses. If applicable, describe which groupings were chosen and why                                                                      | N/A               |
| Statistical methods          | 12      | (a) Describe all statistical methods, including those used to control for confounding                                                                                                             | N/A               |
|                              |         | (b) Describe any methods used to examine subgroups and interactions                                                                                                                               | N/A               |
|                              |         | (c) Explain how missing data were addressed                                                                                                                                                       | N/A               |
|                              |         | (d) If applicable, explain how loss to follow-up was addressed                                                                                                                                    | N/A               |
|                              |         | (e) Describe any sensitivity analyses                                                                                                                                                             | N/A               |
| <b>Results</b>               |         |                                                                                                                                                                                                   |                   |
| Participants                 | 13*     | (a) Report numbers of individuals at each stage of study—eg numbers potentially eligible, examined for eligibility, confirmed eligible, included in the study, completing follow-up, and analysed | Pages 10-11       |
|                              |         | (b) Give reasons for non-participation at each stage                                                                                                                                              | N/A               |
|                              |         | (c) Consider use of a flow diagram                                                                                                                                                                | N/A               |
| Descriptive data             | 14*     | (a) Give characteristics of study participants (eg demographic,                                                                                                                                   | Pages 10-11       |

|                          |     |                                                                                                                                                                                                              |             |
|--------------------------|-----|--------------------------------------------------------------------------------------------------------------------------------------------------------------------------------------------------------------|-------------|
|                          |     | clinical, social) and information on exposures and potential confounders                                                                                                                                     |             |
|                          |     | (b) Indicate number of participants with missing data for each variable of interest                                                                                                                          | N/A         |
|                          |     | (c) Summarise follow-up time (eg, average and total amount)                                                                                                                                                  | Pages 10-11 |
| Outcome data             | 15* | Report numbers of outcome events or summary measures over time                                                                                                                                               | Pages 10-11 |
| Main results             | 16  | (a) Give unadjusted estimates and, if applicable, confounder-adjusted estimates and their precision (eg, 95% confidence interval). Make clear which confounders were adjusted for and why they were included | Pages 10-11 |
|                          |     | (b) Report category boundaries when continuous variables were categorized                                                                                                                                    | N/A         |
|                          |     | (c) If relevant, consider translating estimates of relative risk into absolute risk for a meaningful time period                                                                                             | N/A         |
| Other analyses           | 17  | Report other analyses done—eg analyses of subgroups and interactions, and sensitivity analyses                                                                                                               | N/A         |
| <b>Discussion</b>        |     |                                                                                                                                                                                                              |             |
| Key results              | 18  | Summarise key results with reference to study objectives                                                                                                                                                     | Page 12     |
| Limitations              | 19  | Discuss limitations of the study, taking into account sources of potential bias or imprecision. Discuss both direction and magnitude of any potential bias                                                   | Pages 13-14 |
| Interpretation           | 20  | Give a cautious overall interpretation of results considering objectives, limitations, multiplicity of analyses, results from similar studies, and other relevant evidence                                   | Pages 12-14 |
| Generalisability         | 21  | Discuss the generalisability (external validity) of the study results                                                                                                                                        | Pages 14-15 |
| <b>Other information</b> |     |                                                                                                                                                                                                              |             |
| Funding                  | 22  | Give the source of funding and the role of the funders for the present study and, if applicable, for the original study on which the present article is based                                                | Page 2      |

\*Give information separately for exposed and unexposed groups.

**Note:** An Explanation and Elaboration article discusses each checklist item and gives methodological background and published examples of transparent reporting. The STROBE checklist is best used in conjunction with this article (freely available on the Web sites of PLoS Medicine at <http://www.plosmedicine.org/>, Annals of Internal Medicine at <http://www.annals.org/>, and Epidemiology at <http://www.epidem.com/>). Information on the STROBE Initiative is available at <http://www.strobe-statement.org>.

## Health system costs for cancer medications and radiation treatment in the four most common cancers

Running Title: Cost of drugs and radiation in the four most common cancers

Nicole Mittmann MSc PhD<sup>1,2,3</sup>, Ning Liu MSc PhD<sup>4</sup>, Stephanie Y. Cheng MSc<sup>4</sup>, Soo Jin Seung HBSc<sup>5</sup>, Farah E. Saxena MPH<sup>4</sup>, Nicole J. Look Hong MD MSc<sup>6</sup>, Craig C. Earle MD MSc<sup>4,6</sup>, Matthew Cheung MD SM<sup>4,6</sup>, Natasha Leighl MD MSc<sup>7</sup>, Natalie Coburn MD, MPH<sup>4,6</sup>, Carlo DeAngelis PharmD<sup>6</sup>, William K. Evans MD<sup>8</sup>.

1. Sunnybrook Research Institute, Sunnybrook Health Sciences Centre, Toronto, Ontario, Canada
2. Cancer Care Ontario, Toronto, Ontario, Canada (May 2019)
3. Canadian Agency for Drugs and Technologies in Health, Ottawa, Canada (June 2019)
4. ICES, Toronto, Ontario, Canada
5. Health Outcomes and PharmacoEconomic (HOPE) Research Centre, Toronto, Ontario, Canada
6. Odette Cancer Centre, Sunnybrook Health Sciences Centre, Toronto, Ontario, Canada
7. University Health Network, Toronto, Ontario, Canada
8. McMaster University, Hamilton, Ontario, Canada

### Address for Correspondence:

Dr. Nicole Mittmann  
Sunnybrook Health Sciences Centre  
2075 Bayview Avenue, E240  
Toronto, Ontario  
Tel: 416-480-3505  
Email: nicole.mittmann@sunnybrook.ca

## **Funding**

This project was funded by a Health Services Network grant from the Ontario Institute for Cancer Research.

## **Contributor's Statement**

As authors of the study, Nicole Mittmann, Ning Liu, Stephanie Cheng, Soo Jin Seung and Farah Saxena contributed to the design of the study, interpretation of the data, the writing and editing of the manuscript, as well as, the selection of journal publication.

Nicole Look Hong, Craig Earle, Matthew Cheung, Natasha Leighl, Natalie Coburn, Carlo DeAngelis and William Evans contributed to the interpretation of the data, the writing and editing of the manuscript.

## **Acknowledgement**

This study was supported by ICES, which is funded by an annual grant from the Ontario Ministry of Health and Long-Term Care (MOHLTC). The opinions, results and conclusions reported in this paper are those of the authors and are independent from the funding sources. No endorsement by ICES or the Ontario MOHLTC is intended or should be inferred.

Parts of this material are based on data and/or information compiled and provided by the Canadian Institute for Health Information (CIHI). However, the analyses, conclusions, opinions and statements expressed in the material are those of the author(s), and not necessarily those of CIHI.

1  
2  
3 Parts of this material are based on data and information provided by Cancer Care  
4 Ontario (CCO). The opinions, results, views and conclusions reported in this paper are  
5 those of the authors and do not necessarily reflect those of CCO. No endorsement by  
6 CCO is intended or should be inferred.  
7  
8  
9  
10  
11  
12

13 We thank IMS Brogen Inc. for use of their Drug Information database.  
14  
15  
16  
17  
18  
19  
20  
21  
22  
23  
24  
25  
26  
27  
28  
29  
30  
31  
32  
33  
34  
35  
36  
37  
38  
39  
40  
41  
42  
43  
44  
45  
46  
47  
48  
49  
50  
51  
52  
53  
54  
55  
56  
57  
58  
59  
60

Confidential

### Conflict of Interest:

There are no conflicts to declare. NGC receives salary support from Cancer Care Ontario, as well as the Sherif and MaryLou Hanna Chair in Surgical Oncology.

## ABSTRACT

**Background:** Previous costing and resource estimates for cancer have not been robust due to lack of comprehensive data on cancer-related medication and radiation treatment. We calculated mean overall costs per patient per cancer medication and radiation, as well as, by disease and stage in the first year (365 days) after diagnosis for the most prevalent cancers.

**Methods:** A retrospective cohort study design was used to identify population health system resources and costs (\$CAN) for patients diagnosed with breast, colorectal, lung and prostate cancers between January 1, 2010 and December 31, 2015. The overall average cost per patient in 365 days after diagnosis was determined for cancer-related medications and radiation treatment using two novel costing algorithms. The cost by disease, disease subtype and stage were determined.

**Results:** There were 168,316 Ontarians diagnosed with breast (N=50,141), colorectal (CRC, N=38,108), lung (N=34,809) and prostate (N=45,258) cancer. Cancer-related medications overall mean costs were \$8,167 (95% CI: 8,023-8,311); \$6,568 (6,446-6,691); \$2,900 (2,816-2,984); and \$1,211 (1,175-1,247) for breast, CRC, lung and prostate, respectively. Mean overall radiation treatment costs were \$18,529 (18,415-18,643); \$15,177 (14,899-15,456); \$10,818 (10,669-10,966); and \$16,887 (16,648-17,125).



1  
2  
3 **Interpretation:** In general, Stage III and IV were the most expensive disease stages  
4  
5 across all four cancers for cancer-related medications and radiation treatment. Our work  
6  
7 updates previous costing estimates to help understand resources and costs critical to  
8  
9 health system planning in a single payer system.  
10  
11  
12  
13  
14  
15  
16  
17  
18  
19  
20  
21  
22  
23  
24  
25  
26  
27  
28  
29  
30  
31  
32  
33  
34  
35  
36  
37  
38  
39  
40  
41  
42  
43  
44  
45  
46  
47  
48  
49  
50  
51  
52  
53  
54  
55  
56  
57  
58  
59  
60

Confidential

## INTRODUCTION

Cancer is clinically burdensome to patients and becoming increasingly burdensome economically. Treatment is associated with substantial financial toxicity (1). When planning system health services, it is important to understand both the resources and costs associated with cancer treatment. Although many publications outlining treatment costs exist, namely through disease cohort studies and modelling, the majority are unable to capture direct costs with a population level approach.

In this study, we used previously-constructed costing algorithms to examine cancer-related medication and radiation resources and costing across the four most common cancers, namely breast, colorectal (CRC), lung, and prostate in the province of Ontario, Canada. The overarching objective was to examine the costs for radiation treatment and cancer-related medications in the first year after diagnosis for breast, lung, CRC, and prostate cancer patients. Secondary objectives were to examine the costs for radiation treatment and cancer-related medications between patients of different stage at the time diagnosis, within the same type of cancer and by cancer subtype; and to examine the costs for radiation treatment and cancer-related medications among patients diagnosed with different type of cancer, across different stages and by cancer subtype.

## METHODS

Clinical and health administrative databases were linked using unique encoded identifiers and analyzed at ICES. ICES is an independent, non-profit research institute whose legal status under Ontario's health information privacy law allows it to collect and analyze health care and demographic data, without consent, for health system evaluation and improvement. These administrative databases allow researchers to identify and quantify the health system resources, after which, they can be valued with unit costs. Wodchis and colleagues developed a costing algorithm based on these database that allows the calculation of person-level health care costs (referred hereinafter as the Person-Level Case Costing Methodology or PLCCM) (2). In this algorithm, the cost of services that are episodic in nature are estimated using a cost per weighted case (CPWC) methodology, whereas the cost of services that are reported by visits or claims can be more directly obtained. A number of studies have used the PLCCM to estimate the costs of different diseases across the continuum of care (3-7). In order to enhance the PLCCM with comprehensive costing for cancer treatments, we recently created two additional oncology-specific costing methodologies: one for cancer-related medications (Cancer Medication Costing Algorithm, CMCA) and one for radiation treatment (Cancer Radiation Costing Algorithm, CRCA). The algorithms and their validation, are described elsewhere (8).

### Study Design

A retrospective cohort study design was used to identify population health system resources and costs for patients diagnosed with incident breast (ICD-O-3 C500 –

1  
2  
3 C509), lung (ICD-O-3 C340-C343,C348-C349), CRC (ICD-O-3 C18.X (excluding C181  
4 – appendix), C199, C209), and prostate cancer (ICD-O-3 C61) cases diagnosed from  
5  
6 January 1 2010 to December 31 2014. ICES, a Prescribed Entity under the provincial  
7  
8 Personal Health Information and Protection of Privacy Act, encodes a personal  
9  
10 identifier, which allows linkage of data from different care providers and across sectors  
11  
12 in health administrative databases. Individuals without valid health insurance or  
13  
14 ineligible for health insurance were excluded from the analysis. The first index cancer  
15  
16 was used if a patient was diagnosed with more than one of those four cancers during  
17  
18 the accrual period. Demographic variables included those available from the  
19  
20 administrative databases including age, gender, location of residence, comorbidity,  
21  
22 income and exposure to health system resources. End of follow-up was defined as the  
23  
24 earliest of death date, one year after cancer diagnosis, or 1 day before the diagnosis of  
25  
26 a second cancer and were censored and adjusted for 365 days.  
27  
28  
29  
30  
31  
32  
33  
34  
35  
36  
37  
38  
39  
40  
41  
42  
43  
44  
45  
46  
47  
48  
49  
50  
51  
52  
53  
54  
55  
56  
57  
58  
59  
60

### Algorithm Development

We applied two provincial costing algorithms to these cohorts to identify direct health system, total and disaggregated, undiscounted costs based on a single-payer government perspective (Ontario, Canada). A comprehensive description of both algorithms are found in a previous publication (8). In short, we created and used two oncology-specific costing methodologies: one for cancer-related medications (Cancer Medication Costing Algorithm, CMCA) and one for radiation treatment (Cancer Radiation Costing Algorithm, CRCA) for more specific, comprehensive cancer costing evaluations. We used a bottom-up approach to determine cost of treatment at the

1  
2  
3 individual patient encounter level. Where individual patient health sector costs were not  
4  
5 available (e.g., system or institutional costs), then a top-down approach was used to  
6  
7 allocate aggregated costs to each patient encounter. Direct treatment costs were  
8  
9 calculated from the perspective of the Ontario public healthcare payer; costs incurred by  
10  
11 the individual patient or private insurers were not addressed. The CMCA estimated the  
12  
13 per person costs for patients who received cancer-related medications, both treatment  
14  
15 and supportive. The CRCA estimates the per person costs for patients undergoing  
16  
17 radiation therapy. Costs were disaggregated into planning and treatment costs. Costs  
18  
19 (mean, median, SD, IQR) for all patients in the cohort (intent to treat analysis) and cost  
20  
21 for those individuals who used the resource (clinically evaluable) were determined.  
22  
23  
24  
25  
26  
27  
28

### 29 Analysis

30  
31  
32 The primary analysis calculated the mean overall cost per patient per cancer-related  
33  
34 medication and radiation by disease and stage in the first year (365 days) after  
35  
36 diagnosis. A secondary analysis examined cost by disease subtype. For breast  
37  
38 cancer, subtypes included (i) hormone receptor (estrogen and/or progesterone) positive  
39  
40 + HER2 overexpressed; (ii) hormone receptor positive + HER2 negative; (iii) hormone  
41  
42 receptor negative + HER2 overexpressed; and (iv) hormone receptor negative + HER2  
43  
44 negative. For lung cancer, we stratified costs into i) Non Small Cell Lung Cancer  
45  
46 (NSCLC) and ii) Small Cell Lung Cancer (SCLC). CRC was stratified into i) colon and  
47  
48 ii) rectal. The cost by stage in prostate cancer was calculated. Finally, costs for those  
49  
50 individuals who survived for two or more years were also calculated.  
51  
52  
53  
54  
55  
56  
57  
58  
59  
60

## RESULTS

There were 168,316 Ontarians diagnosed with one of breast, colorectal, lung and prostate cancer between January 1, 2010 and December 31, 2015. The mean age of all cancer patients at diagnosis was 66.1 (SD: 12.4) years, with the mean age being the highest in lung cancer [68.8 (10.4) years] and lowest for breast cancer [61.3 years (13.7)] and overall equally divided by gender for CRC and lung cancer. The average follow-up time for all four disease sites was 10 months (Table 1).

### Breast Cancer

The majority of women with a diagnosis of breast cancer (N=50,141) were diagnosed in the early stages (Stages I/II). 93% had an entire year of follow-up and 67% were not hospitalized (Table 1). The majority of women at all stages used cancer-related medications (63.2%) and the mean cost was \$8,167 (95%CI: \$8,023-\$8,311) over the one-year period (Table 2). Eighty-one percent of individuals used radiation services within one year after diagnosis and for those who did, the mean cost was \$18,529 (95%CI: \$18,415-\$18,643) (Table 3). Overall cancer-related drug costs and radiation costs increased by stage (Figure 1A, Figure 2A). Women who were HER2+ had 6 to 10-fold higher overall cancer related drug costs (Appendix Table 1).

### Colorectal Cancer

38,109 had a diagnosis of colorectal cancer at a mean age of 68 years and there were slightly more males (54.5%). Of those staged, half were diagnosed in Stage III/IV (Table 1). Sixteen percent of individuals died in the year following their diagnosis. The mean overall costs for cancer related medications [\$9,637 (95%CI: \$9,431-\$9,843)] and

1  
2  
3 radiation treatment [\$15,188 (95%CI: \$14,899-\$15,456)] and was highest in those with  
4  
5 a Stage III diagnosis (Table 2 and 3). The cost of cancer-related treatment medications  
6  
7 was highest in those individuals with a Stage IV diagnosis. When stratified into colon  
8  
9 and rectal diseases, overall costs for medications were similar for both disease sites but  
10  
11 higher in the rectal disease group for radiation costs (Appendix Table 1 and 2).  
12  
13  
14  
15  
16

### 17 Lung Cancer

18  
19 The majority of lung cancer cases (N=34,809) were diagnosed in Stage IV. There was  
20  
21 an equal split between genders and the mean age was 69 years. More than half of  
22  
23 patients died within one of diagnosis and more than two thirds died within two years of a  
24  
25 diagnosis (Table 1). Eighty percent of individuals with a diagnosis of lung cancer used  
26  
27 cancer-related medications and 67% of individuals received radiation treatment. The  
28  
29 mean overall cost for cancer-related drugs was \$2,900 (95%CI: \$2,816-\$2,984) and  
30  
31 increased by stage of disease. The mean overall cost for radiation treatment was  
32  
33 \$10,818 (95%: \$10,669-\$10,966) where costs in Stage II and III were highest (Table 2  
34  
35 and 3). Treatment drugs were more costly than supportive drugs (Figure 1C) and  
36  
37 radiation treatment was more costly than planning and operational costs (Figure 2C).  
38  
39 When stratified into NSCLC and SCLC cases, Stage III costs were still highest for  
40  
41 cancer-related medication and radiation treatment (Appendix, Table 1).  
42  
43  
44  
45  
46  
47  
48

### 49 Prostate Cancer

50  
51 The mean age of prostate cancer patients (N=45,258) at diagnosis was 68 years. Most  
52  
53 patients were not hospitalized and thus did not have a Charlson score. Less than 5%  
54  
55  
56  
57  
58  
59  
60

1  
2  
3 died during the one year follow up period (Table 1). Half of men received cancer-  
4 related medications and radiation treatment, with the proportion increasing by stage for  
5 cancer medications related cohort and increased radiation utilization being highest in  
6 State II and III (Table 2 and 3). The overall cost per stage increased as the stage of  
7 prostate cancer increased in severity (Figure 1D, Figure 2D).  
8  
9  
10  
11  
12  
13  
14  
15  
16

## 17 **INTERPRETATION**

18 This study examined disease-specific and stage specific costs associated with  
19 important cancer-related medications and radiation treatment using two novel costing  
20 algorithms leveraging population level administrative databases. The costs presented  
21 also provide more granularity by disease subtype. Previous published costing studies  
22 using the PLCCM algorithm underestimated the critical costs related to cancer  
23 treatment around medications and radiation as one cannot easily identify cancer-  
24 specific drugs and supportive drugs or identify treatment and planning radiation costs.  
25 With respect to radiation treatment, a recent summary of studies examining radiation  
26 costs showed that there is a wide range of costs (9), with some based on US estimates  
27 (10-13) or older data (14). Our results show that Stage III and IV cancers are generally  
28 the most expensive stages for both medications and radiation across all four disease  
29 sites. More specifically, certain subtypes within each cancer type showed greater costs  
30 in the first year after diagnosis. Although not described here, each individual resource  
31 utilized by a cohort of individuals can be identified and explored using this bottom-up  
32 costing algorithm approach.  
33  
34  
35  
36  
37  
38  
39  
40  
41  
42  
43  
44  
45  
46  
47  
48  
49  
50  
51  
52  
53  
54  
55  
56  
57  
58  
59  
60



1  
2  
3 Our efforts in designing more comprehensive costing algorithms have face validity when  
4 compared to methods and studies conducted by other Canadian and international  
5 investigators (15-20). We expect costs from other administrative databases studies not  
6 using the costing algorithms to have lower overall costs and we expect difference in  
7 costs when compared to international studies. For example, our overall mean oneyear  
8 medication costs of \$1,211 (95%CI: \$1,175 - \$1,247) for prostate cancer were higher  
9 from those reported one year after diagnosis (\$514 CAN 2007) as calculated by Krahn  
10 et al because of the inclusion of additional medication databases (15). Additionally,  
11 radiation costs in that study were reported as negligible because the databases for  
12 planning, treatment and operational costs were not included. Moreover, stage-specific  
13 costs calculated in our study could not be compared to those in Krahn's study because  
14 stage based costing was not assessed (21). Internationally, our one-year mean post  
15 index radiation costs of \$16,442 (95%CI: \$16,293-\$16,591) for women with stage I and  
16 \$19,973 (95%CI: \$19,781-\$20,165) for stage II breast cancer were in line with those  
17 from insurance claims for radiation (\$14,910 US\$) in women with stage I/II breast  
18 cancer (16). Mean medication costs were different based on our cohort of women with  
19 early stage disease [(Stage I: \$5,409 (95%CI: \$5,207-\$5,611); Stage II: \$8,519 (95%CI:  
20 8,314, 8,724)] compared to \$13,373 US in that US cohort. These variances are mostly  
21 likely reflective of differences in health system frameworks and funding, but highlight  
22 opportunities for improving costs for healthcare systems.

23  
24  
25  
26  
27  
28  
29  
30  
31  
32  
33  
34  
35  
36  
37  
38  
39  
40  
41  
42  
43  
44  
45  
46  
47  
48  
49  
50  
51  
52 Strengths of this work include the comprehensiveness of the data for the entire  
53 provincial population of 35 million residents, but there are also some limitations. Our  
54

1  
2  
3 analysis provides costs only for initial care in the first year after a cancer diagnosis and  
4 does not consider the cost of maintenance, survivorship and end of life phases of care.  
5  
6 We used this time horizon as it was in line with other phase-based costing approaches  
7  
8 (21-23). We did, however, establish that even in one year, that there are survival  
9  
10 differences across the 4 most common cancers with one year survival for breast being  
11  
12 highest after diagnosis compared to one year survival in lung cancer.  
13  
14  
15  
16  
17  
18

19 Finally, it is important to highlight that this study reported only on the publicly funded  
20  
21 health system costs. We did not have access to costs incurred by the individual patient  
22  
23 or private insurers and as such, they are not addressed in this analysis. Understanding  
24  
25 this type of utilization and cost information would be important in cohorts where the  
26  
27 mean age at diagnosis was younger than 65 years as oral drugs costs are unknown.  
28  
29  
30  
31  
32

33 This work sets the stage for establishing the health system costs for cancer-related  
34  
35 medications and radiation therapy which can be used as baseline utilization and costs  
36  
37 for future innovations and incremental analyses. Although, all cohorts were anchored at  
38  
39 2015, the algorithms created can examine the cost by any disease site, stage or phase  
40  
41 of care, including updated time horizons, based on the defined cohorts because it uses  
42  
43 a resource based bottom-up calculation. A number of studies have already leveraged  
44  
45 the two cancer specific costing algorithms (24, 25); ongoing analyses include examining  
46  
47 costs in melanoma, pancreatic, gastric, esophageal and lung cancer. Future work will  
48  
49 examine other phases of care in the care continuum and will generate costs across  
50  
51 other disease sites and subtypes. Understanding the resources and cost of publicly  
52  
53  
54  
55  
56  
57  
58  
59  
60

1  
2  
3 funded medications and radiation therapy are critical to health system planning and  
4 sustainability in a single payer system. Previous costing and resource estimates have  
5 not been robust due to the lack of comprehensive data on cancer-related medication  
6 and radiation treatment. Our work updates previous costing estimates. More refined  
7 costing estimates are useful as inputs to allow for more robust health economic  
8 modelling and health system planning.  
9  
10  
11  
12  
13  
14  
15  
16  
17  
18  
19  
20  
21  
22  
23  
24  
25  
26  
27  
28  
29  
30  
31  
32  
33  
34  
35  
36  
37  
38  
39  
40  
41  
42  
43  
44  
45  
46  
47  
48  
49  
50  
51  
52  
53  
54  
55  
56  
57  
58  
59  
60

Confidential

**REFERENCES**

1. Schnipper LE, Meropol N. ASCO Addresses the Rising Cost of Cancer Care. *J Oncol Pract* 2009;5(4):214-215.
2. Wodchis WP, Bushmeneva K, Nikitovic M, McKillop I. Guidelines on Person-Level Costing Using Administrative Databases in Ontario: Working Paper Volume 1. Health System Performance Research Network, 2013
3. Guilcher SJ, Bronskill SE, Guan J, Wodchis WP. Who Are the High-Cost Users? A Method for Person-Centred Attribution of Health Care Spending. *PLoS One* 2016;11(3):e0149179.
4. Laberge M, Wodchis WP, Barnsley J, Laporte A. Costs of health care across primary care models in Ontario. *BMC Health Serv Res* 2017;17(1):511.
5. Rosella LC, Fitzpatrick T, Wodchis WP, Calzavara A, Manson H, Goel V. High-cost health care users in Ontario, Canada: demographic, socio-economic, and health status characteristics. *BMC Health Serv Res* 2014;14:532.
6. Wodchis WP, Austin PC, Henry DA. A 3-year study of high-cost users of health care. *CMAJ* 2016;188(3):182-188.
7. Lunskey Y, de OC, Wilton A, Wodchis W. High health care costs among adults with intellectual and developmental disabilities: a population-based study. *J Intellect Disabil Res* 2019;63(2):124-137.
8. Mittmann N, Cheng SY, Liu N et al. The generation of two specific cancer costing algorithms using Ontario administrative databases. *Curr Onc* (in press Oct 2019; accepted April 2019).
9. Rahman F, Seung SJ, Cheng SY, Saherawala H, Earle CC, Mittmann N. Radiation costing methods: a systematic review. *Curr Oncol* 2016;23(4):e392-e408.
10. Furlan JC, Chan KK, Sandoval GA et al. The combined use of surgery and radiotherapy to treat patients with epidural cord compression due to metastatic disease: a cost-utility analysis. *Neuro Oncol* 2012;14(5):631-640.

- 1  
2  
3 11. Hodges JC, Beg MS, Das P, Meyer J. Cost-effectiveness analysis of intensity  
4 modulated radiation therapy versus 3-dimensional conformal radiation therapy for  
5 anal cancer. *Int J Radiat Oncol Biol Phys* 2014;89(4):773-783.  
6  
7
- 8  
9 12. Kim H, Rajagopalan MS, Beriwal S, Huq MS, Smith KJ. Cost-effectiveness  
10 analysis of single fraction of stereotactic body radiation therapy compared with  
11 single fraction of external beam radiation therapy for palliation of vertebral bone  
12 metastases. *Int J Radiat Oncol Biol Phys* 2015;91(3):556-563.  
13  
14
- 15  
16 13. Konski A. Cost-effectiveness of intensity-modulated radiation therapy. *Expert Rev*  
17 *Pharmacoecon Outcomes Res* 2005;5(2):137-140.  
18  
19
- 20  
21 14. Earle C, Coyle D, Smith A, Agboola O, Evans WK. The cost of radiotherapy at an  
22 Ontario regional cancer centre: a re-evaluation. *Crit Rev Oncol Hematol*  
23 1999;32(2):87-93.  
24  
25
- 26  
27 15. Krahn MD, Bremner KE, Luo J, Alibhai SM. Health care costs for prostate cancer  
28 patients receiving androgen deprivation therapy: treatment and adverse events.  
29 *Curr Oncol* 2014;21(3):e457-e465.  
30  
31
- 32  
33 16. Blumen H, Fitch K, Polkus V. Comparison of Treatment Costs for Breast Cancer,  
34 by Tumor Stage and Type of Service. *Am Health Drug Benefits* 2016;9(1):23-32.  
35  
36
- 37  
38 17. Sun L, Legood R, Dos-Santos-Silva I, Gaiha SM, Sadique Z. Global treatment  
39 costs of breast cancer by stage: A systematic review. *PLoS One*  
40 2018;13(11):e0207993.  
41  
42
- 43  
44 18. Laudicella M, Walsh B, Burns E, Smith PC. Cost of care for cancer patients in  
45 England: evidence from population-based patient-level data. *Br J Cancer*  
46 2016;114(11):1286-1292.  
47  
48
- 49  
50 19. Greenup RA, Blitzblau RC, Houck KL et al. Cost Implications of an Evidence-  
51 Based Approach to Radiation Treatment After Lumpectomy for Early-Stage Breast  
52 Cancer. *J Oncol Pract* 2017;13(4):e283-e290.  
53  
54
- 55  
56 20. McGuffin M, Merino T, Keller B, Pignol JP. Who Should Bear the Cost of  
57 Convenience? A Cost-effectiveness Analysis Comparing External Beam and  
58  
59  
60

1  
2  
3 Brachytherapy Radiotherapy Techniques for Early Stage Breast Cancer. Clin  
4 Oncol (R Coll Radiol) 2017;29(3):e57-e63.  
5  
6

7  
8 21. Krahn MD, Zagorski B, Laporte A et al. Healthcare costs associated with prostate  
9 cancer: estimates from a population-based study. BJU Int 2010;105(3):338-346.  
10

11  
12 22. de OC, Pataky R, Bremner KE et al. Phase-specific and lifetime costs of cancer  
13 care in Ontario, Canada. BMC Cancer 2016;16(1):809.  
14

15  
16  
17 23. de OC, Bremner KE, Pataky R et al. Understanding the costs of cancer care before  
18 and after diagnosis for the 21 most common cancers in Ontario: a population-  
19 based descriptive study. CMAJ Open 2013;1(1):E1-E8.  
20

21  
22  
23 24. Look Hong NJ, Cheng SY, Wright FC, Petrella TM, Earle CC, Mittmann N. Resource  
24 utilization and disaggregated cost analysis for initial treatment of melanoma. J Can  
25 Pol 2018; 16:63-69.  
26

27  
28  
29 25. Mittmann N, Earle CC, Cheng SY et al. Population-Based Study to Determine the  
30 Health System Costs of Using the 21-Gene Assay. J Clin Oncol. 2018 Jan  
31 20;36(3):238-243.  
32  
33  
34  
35  
36  
37  
38  
39  
40  
41  
42  
43  
44  
45  
46  
47  
48  
49  
50  
51  
52  
53  
54  
55  
56  
57  
58  
59  
60

**Table 1. Characteristics of cancer patients diagnosed between 2010-2015, by primary cancer site**

| Characteristics                | Measure        | Breast Cancer<br>(N=50,141) | Colorectal Cancer<br>(N=38,108) | Lung Cancer<br>(N=34,809) | Prostate Cancer<br>(N=45,258) | TOTAL<br>(N=168,316) |
|--------------------------------|----------------|-----------------------------|---------------------------------|---------------------------|-------------------------------|----------------------|
| Female                         |                | 50,141<br>(100.0%)          | 17,327<br>(45.5%)               | 17,001<br>(48.8%)         | 0 (0.0%)                      | 84,469<br>(50.2%)    |
| Age at cancer diagnosis, years | Mean $\pm$ SD  | 61.3 $\pm$ 13.7             | 68.4 $\pm$ 13.3                 | 68.8 $\pm$ 10.4           | 67.5 $\pm$ 9.5                | 66.1 $\pm$ 12.4      |
|                                | Median (IQR)   | 61 (51-71)                  | 69 (59-79)                      | 69 (62-76)                | 67 (61-74)                    | 66 (58-75)           |
| Rural residents                |                | 6,176 (12.3%)               | 5,642 (14.8%)                   | 5,523 (15.9%)             | 6,513 (14.4%)                 | 23,854<br>(14.2%)    |
| Neighbourhood Income           | Lowest         | 8,497 (16.9%)               | 7,217 (18.9%)                   | 8,232 (23.6%)             | 6,934 (15.3%)                 | 30,880<br>(18.3%)    |
|                                | Second lowest  | 9,608 (19.2%)               | 7,754 (20.3%)                   | 7,538 (21.7%)             | 8,442 (18.7%)                 | 33,342<br>(19.8%)    |
|                                | Middle         | 9,918 (19.8%)               | 7,705 (20.2%)                   | 6,772 (19.5%)             | 8,910 (19.7%)                 | 33,305<br>(19.8%)    |
|                                | Second highest | 10,873<br>(21.7%)           | 7,804 (20.5%)                   | 6,479 (18.6%)             | 9,804 (21.7%)                 | 34,960<br>(20.8%)    |
|                                | Highest        | 11,048<br>(22.0%)           | 7,461 (19.6%)                   | 5,635 (16.2%)             | 10,986<br>(24.3%)             | 35,130<br>(20.9%)    |
|                                | Missing        | 197 (0.4%)                  | 167 (0.4%)                      | 153 (0.4%)                | 182 (0.4%)                    | 699 (0.4%)           |
| Cancer stage at diagnosis      | I              | 20,759<br>(41.4%)           | 8,269 (21.7%)                   | 6,104 (17.5%)             | 10,154<br>(22.4%)             | 45,286<br>(26.9%)    |
|                                | II             | 18,607<br>(37.1%)           | 9,124 (23.9%)                   | 2,855 (8.2%)              | 22,103<br>(48.8%)             | 52,689<br>(31.3%)    |
|                                | III            | 6,786 (13.5%)               | 10,755<br>(28.2%)               | 6,989 (20.1%)             | 5,664 (12.5%)                 | 30,194<br>(17.9%)    |
|                                | IV             | 2,433 (4.9%)                | 6,848 (18.0%)                   | 17,714<br>(50.9%)         | 4,058 (9.0%)                  | 31,053<br>(18.4%)    |

1  
2  
3  
4  
5  
6  
7  
8  
9  
10  
11  
12  
13  
14  
15  
16  
17  
18  
19  
20  
21  
22  
23  
24  
25  
26  
27  
28  
29  
30  
31  
32  
33  
34  
35  
36  
37  
38  
39  
40  
41  
42  
43  
44  
45  
46  
47

| Characteristics                     | Measure                 | Breast Cancer<br>(N=50,141) | Colorectal Cancer<br>(N=38,108) | Lung Cancer<br>(N=34,809) | Prostate Cancer<br>(N=45,258) | TOTAL<br>(N=168,316) |
|-------------------------------------|-------------------------|-----------------------------|---------------------------------|---------------------------|-------------------------------|----------------------|
|                                     | Unknown                 | 1,556 (3.1%)                | 3,112 (8.2%)                    | 1,147 (3.3%)              | 3,279 (7.2%)                  | 9,094 (5.4%)         |
| Charlson score *                    | 0                       | 13,232 (26.4%)              | 20,017 (52.5%)                  | 13,051 (37.5%)            | 17,244 (38.1%)                | 63,544 (37.8%)       |
|                                     | 1                       | 1,896 (3.8%)                | 4,017 (10.5%)                   | 3,543 (10.2%)             | 2,529 (5.6%)                  | 11,985 (7.1%)        |
|                                     | ≥2                      | 1,215 (2.4%)                | 2,723 (7.1%)                    | 3,123 (9.0%)              | 1,832 (4.0%)                  | 8,893 (5.3%)         |
|                                     | Not hospitalized        | 33,798 (67.4%)              | 11,351 (29.8%)                  | 15,092 (43.4%)            | 23,653 (52.3%)                | 83,894 (49.8%)       |
| Days of follow-up†                  | Mean ± SD               | 347.7 ± 68.9                | 307.2 ± 117.3                   | 233.0 ± 139.7             | 353.7 ± 54.1                  | 316.4 ± 107.1        |
|                                     | Median (IQR)            | 365 (365-365)               | 365 (365-365)                   | 287 (84-365)              | 365 (365-365)                 | 365 (365-365)        |
| Months of follow-up†                | Mean ± SD               | 11.4 ± 2.3                  | 10.1 ± 3.9                      | 7.7 ± 4.6                 | 11.6 ± 1.8                    | 10.4 ± 3.5           |
|                                     | Median (IQR)            | 12 (12-12)                  | 12 (12-12)                      | 9 (3-12)                  | 12 (12-12)                    | 12 (12-12)           |
| Died during follow-up†              |                         | 1,782 (3.6%)                | 6,369 (16.7%)                   | 17,745 (51.0%)            | 1,535 (3.4%)                  | 27,431 (16.3%)       |
| Died within 2 years after diagnosis |                         | 3,557 (7.1%)                | 9,971 (26.2%)                   | 23,506 (67.5%)            | 3,256 (7.2%)                  | 40,290 (23.9%)       |
| Had an entire year of follow-up†    |                         | 46,574 (92.9%)              | 29,434 (77.2%)                  | 15,482 (44.5%)            | 42,865 (94.7%)                | 134,355 (79.8%)      |
|                                     |                         |                             |                                 |                           |                               |                      |
| Reason for end of follow-up†        | Died during follow-up   | 1,782 (3.6%)                | 6,369 (16.7%)                   | 17,745 (51.0%)            | 1,535 (3.4%)                  | 27,431 (16.3%)       |
|                                     | Had a 2nd cancer        | 1,787 (3.6%)                | 2,314 (6.1%)                    | 1,598 (4.6%)              | 865 (1.9%)                    | 6,564 (3.9%)         |
|                                     | End of 1-year follow-up | 46,572 (92.9%)              | 29,425 (77.2%)                  | 15,466 (44.4%)            | 42,858 (94.7%)                | 134,321 (79.8%)      |

\*: Charlson score calculated using hospitalization data in the 2 years before cancer diagnosis

† End of follow-up was defined as the earliest of death date, 1 year after cancer diagnosis, or 1 day before the diagnosis of a second cancer.



**Table 2. Use of cancer-related medication and mean (95% CI in parentheses) medication costs in 1 year after diagnosis among cancer patients diagnosed between January 1, 2010 and December 31, 2015, by cancer stage at the time of diagnosis**

| Cancer site | Measures                          | Overall                 | Stage I                 | Stage II                | Stage III                  | Stage IV                   | Unknown Stage           |
|-------------|-----------------------------------|-------------------------|-------------------------|-------------------------|----------------------------|----------------------------|-------------------------|
| Breast      | No. of patients                   | 50,141                  | 20,759                  | 18,607                  | 6,786                      | 2,433                      | 1,556                   |
|             | No. (%) used medication           | 38,484<br>(76.8%)       | 13,111<br>(63.2%)       | 16,061<br>(86.3%)       | 6,451<br>(95.1%)           | 2,009<br>(82.6%)           | 852 (54.8%)             |
|             | Mean (95% CI) of medication cost* | 8,167<br>(8,023, 8,311) | 5,409<br>(5,207, 5,611) | 8,519<br>(8,314, 8,724) | 12,046<br>(11,657, 12,434) | 12,460<br>(11,328, 13,592) | 4,454<br>(3,656, 5,252) |
| Colorectal  | No. of patients                   | 38,108                  | 8,269                   | 9,124                   | 10,755                     | 6,848                      | 3,112                   |
|             | No. (%) used medication           | 27,749<br>(72.8%)       | 4,675<br>(56.5%)        | 6,421<br>(70.4%)        | 9,482<br>(88.2%)           | 5,634<br>(82.3%)           | 1,537<br>(49.4%)        |
|             | Mean (95% CI) of medication cost* | 6,568<br>(6,446, 6,691) | 785<br>(683, 887)       | 2,778<br>(2,624, 2,933) | 9,637<br>(9,431, 9,843)    | 11,442<br>(11,075, 11,809) | 3,196<br>(2,782, 3,610) |
| Lung        | No. of patients                   | 34,809                  | 6,104                   | 2,855                   | 6,989                      | 17,714                     | 1,147                   |
|             | No. (%) used medication           | 27,673<br>(79.5%)       | 4,470<br>(73.2%)        | 2,469<br>(86.5%)        | 6,050<br>(86.6%)           | 13,910<br>(78.5%)          | 774 (67.5%)             |
|             | Mean (95% CI) of medication cost* | 2,900<br>(2,816, 2,984) | 612<br>(546, 679)       | 1,415<br>(1,278, 1,552) | 2,291<br>(2,155, 2,428)    | 4,207<br>(4,060, 4,354)    | 2,129<br>(1,673, 2,585) |
| Prostate    | No. of patients                   | 45,258                  | 10,154                  | 22,103                  | 5,664                      | 4,058                      | 3,279                   |

1  
2  
3  
4  
5  
6  
7  
8  
9  
10  
11  
12  
13  
14  
15  
16  
17  
18  
19  
20  
21  
22  
23  
24  
25  
26  
27  
28  
29  
30  
31  
32  
33  
34  
35  
36  
37  
38  
39  
40  
41  
42  
43  
44  
45  
46  
47

|  |                                          |                         |                   |                     |                   |                         |                         |
|--|------------------------------------------|-------------------------|-------------------|---------------------|-------------------|-------------------------|-------------------------|
|  | <b>No. (%) used medication</b>           | 22,599<br>(49.9%)       | 3,231<br>(31.8%)  | 11,763<br>(53.2%)   | 2,798<br>(49.4%)  | 3,276<br>(80.7%)        | 1,531<br>(46.7%)        |
|  | <b>Mean (95% CI) of medication cost*</b> | 1,211<br>(1,175, 1,247) | 268<br>(239, 296) | 966<br>(932, 1,000) | 825<br>(763, 888) | 3,236<br>(3,060, 3,413) | 1,461<br>(1,303, 1,620) |

\*: Among those who had used cancer-related medication.

Confidential

**Table 3. Use of radiation treatment and mean (95% CI in parentheses) radiation treatment costs in 1 year after diagnosis among cancer patients diagnosed between January 1, 2010 and December 31, 2015, by cancer stage at the time of diagnosis**

| Cancer site       | Measures                                | Overall                 | Stage I                 | Stage II                | Stage III               | Stage IV             | Unknown Stage           |
|-------------------|-----------------------------------------|-------------------------|-------------------------|-------------------------|-------------------------|----------------------|-------------------------|
| <b>Breast</b>     | <b>No. of patients</b>                  | 50,141                  | 20,759                  | 18,607                  | 6,786                   | 2,433                | 1,556                   |
|                   | <b>No. (%) used radiation</b>           | 40,659 (81.1%)          | 17,206 (82.9%)          | 15,306 (82.3%)          | 6,054 (89.2%)           | 1,487 (61.1%)        | 606 (38.9%)             |
|                   | <b>Mean (95% CI) of radiation cost*</b> | 18,529 (18,415, 18,643) | 16,442 (16,293, 16,591) | 19,973 (19,781, 20,165) | 23,821 (23,512, 24,131) | 8,476 (7,894, 9,057) | 13,141 (12,220, 14,063) |
| <b>Colorectal</b> | <b>No. of patients</b>                  | 38,108                  | 8,269                   | 9,124                   | 10,755                  | 6,848                | 3,112                   |
|                   | <b>No. (%) used radiation</b>           | 8,979 (23.6%)           | 1,052 (12.7%)           | 1,979 (21.7%)           | 3,803 (35.4%)           | 1,877 (27.4%)        | 268 (8.6%)              |
|                   | <b>Mean (95% CI) of radiation cost*</b> | 15,177 (14,899, 15,456) | 10,613 (9,809, 11,416)  | 17,400 (16,807, 17,992) | 18,853 (18,439, 19,266) | 8,444 (7,957, 8,932) | 11,689 (10,077, 13,301) |
| <b>Lung</b>       | <b>No. of patients</b>                  | 34,809                  | 6,104                   | 2,855                   | 6,989                   | 17,714               | 1,147                   |
|                   | <b>No. (%) used radiation</b>           | 23,158 (66.5%)          | 2,330 (38.2%)           | 1,527 (53.5%)           | 5,864 (83.9%)           | 13,005 (73.4%)       | 432 (37.7%)             |
|                   | <b>Mean (95% CI) of radiation cost*</b> | 10,818 (10,669, 10,966) | 7,982 (7,610, 8,353)    | 13,002 (12,321, 13,682) | 17,790 (17,416, 18,165) | 8,019 (7,877, 8,160) | 8,009 (7,093, 8,925)    |
| <b>Prostate</b>   | <b>No. of patients</b>                  | 45,258                  | 10,154                  | 22,103                  | 5,664                   | 4,058                | 3,279                   |

1  
2  
3  
4  
5  
6  
7  
8  
9  
10  
11  
12  
13  
14  
15  
16  
17  
18  
19  
20  
21  
22  
23  
24  
25  
26  
27  
28  
29  
30  
31  
32  
33  
34  
35  
36  
37  
38  
39  
40  
41  
42  
43  
44  
45  
46  
47

|  |                                         |                               |                         |                               |                               |                              |                              |
|--|-----------------------------------------|-------------------------------|-------------------------|-------------------------------|-------------------------------|------------------------------|------------------------------|
|  | <b>No. (%) used radiation</b>           | 23,207<br>(51.3%)             | 3,228 (31.8%)           | 13,433<br>(60.8%)             | 3,701 (65.3%)                 | 2,478 (61.1%)                | 367 (11.2%)                  |
|  | <b>Mean (95% CI) of radiation cost*</b> | 16,887<br>(16,648,<br>17,125) | 6,467<br>(6,006, 6,928) | 20,543<br>(20,219,<br>20,867) | 17,765<br>(17,168,<br>18,362) | 10,264<br>(9,717,<br>10,812) | 10,564<br>(8,985,<br>12,142) |

\*: Among those who had a non \$0 radiation cost.

Confidential

**Figure 1: Disaggregated mean cancer-related medication costs (treatment and supportive) for different primary cancer sites by cancer stage at diagnosis.** Among those who had a non-zero cost. A-breast cancer; B-colorectal cancer; C-lung cancer; D-prostate cancer.

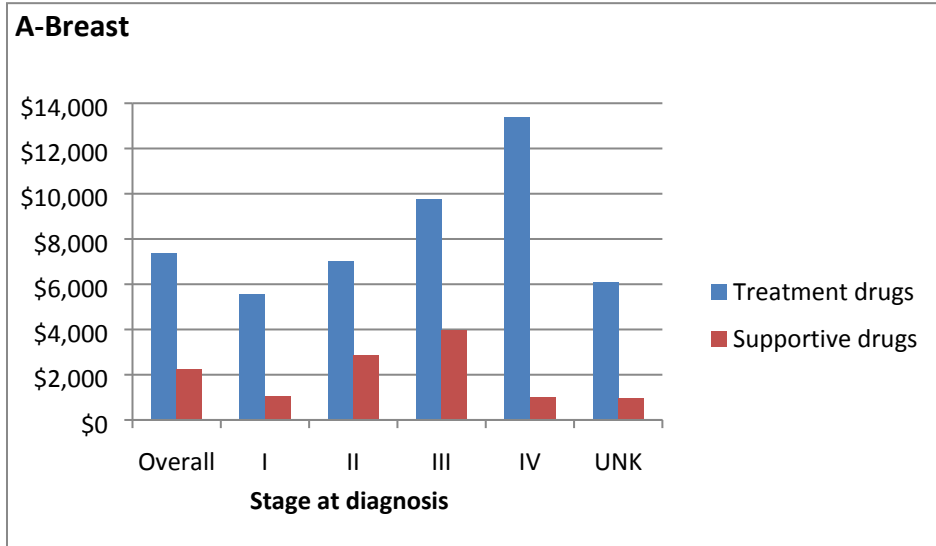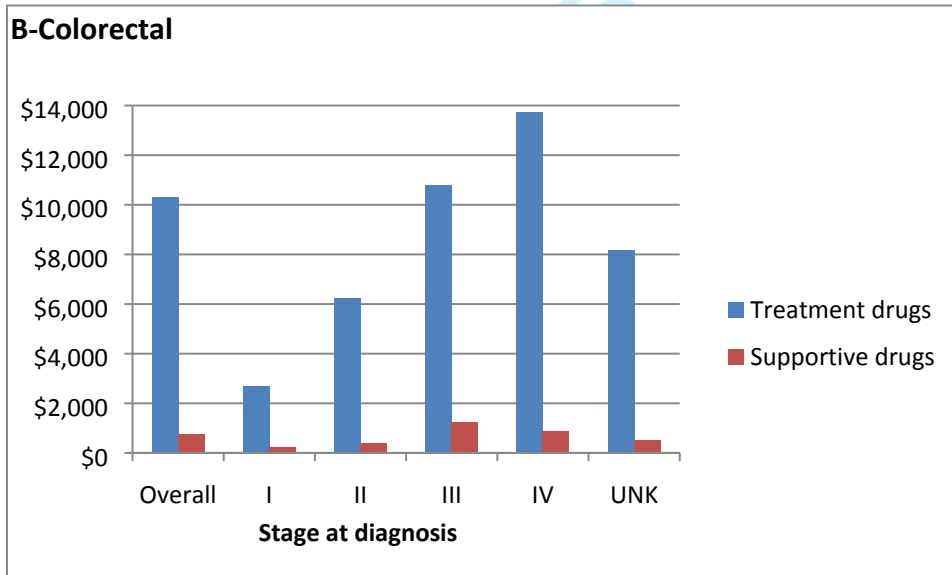

1  
2  
3  
4  
5  
6  
7  
8  
9  
10  
11  
12  
13  
14  
15  
16  
17  
18  
19  
20  
21  
22  
23  
24  
25  
26  
27  
28  
29  
30  
31  
32  
33  
34  
35  
36  
37  
38  
39  
40  
41  
42  
43  
44  
45  
46  
47  
48  
49  
50  
51  
52  
53  
54  
55  
56  
57  
58  
59  
60

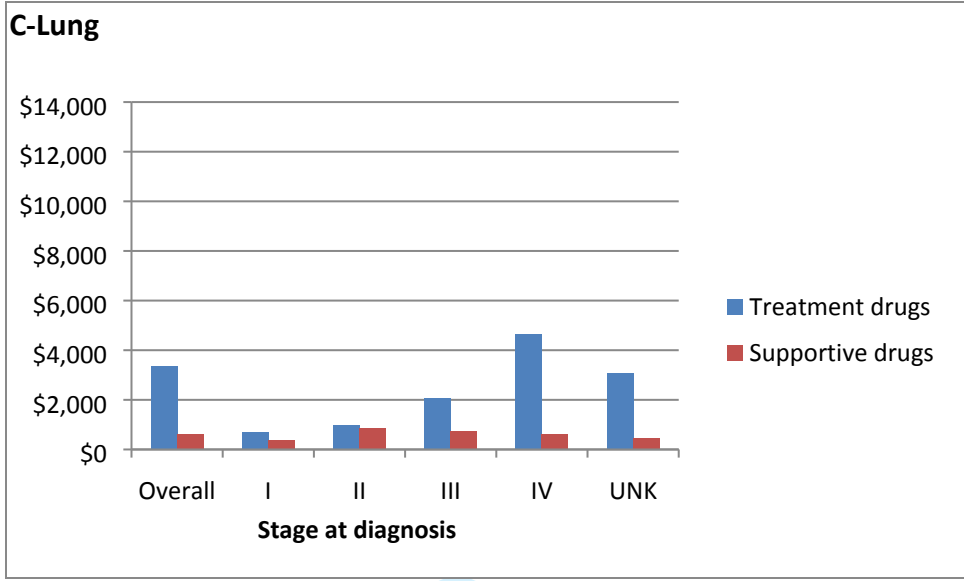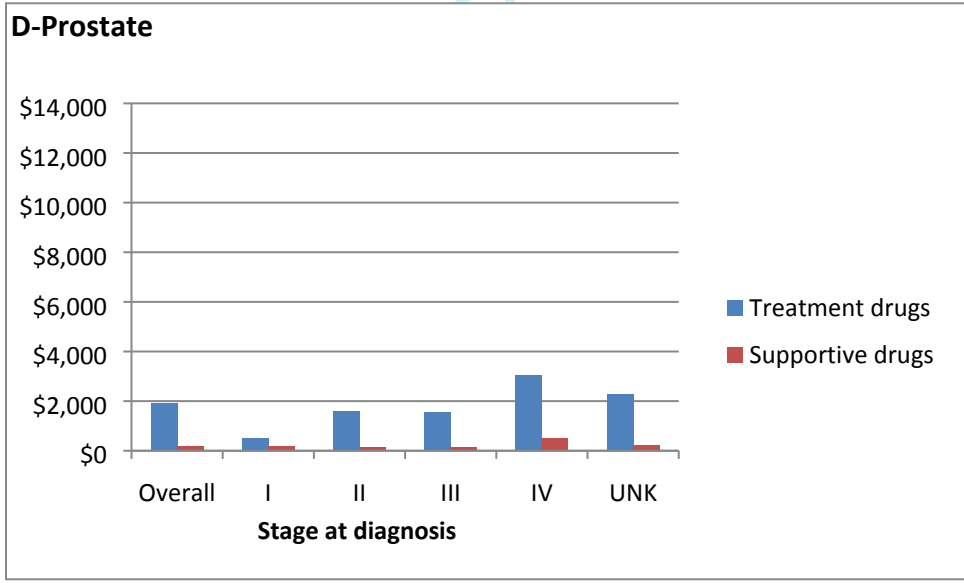

**Figure 2: Disaggregated mean radiation treatment costs (planning, treatment and operational) for different primary cancer sites by cancer stage at diagnosis.** Among those who had a non-zero cost. A-breast cancer; B-colorectal cancer; C-lung cancer; D-prostate cancer.

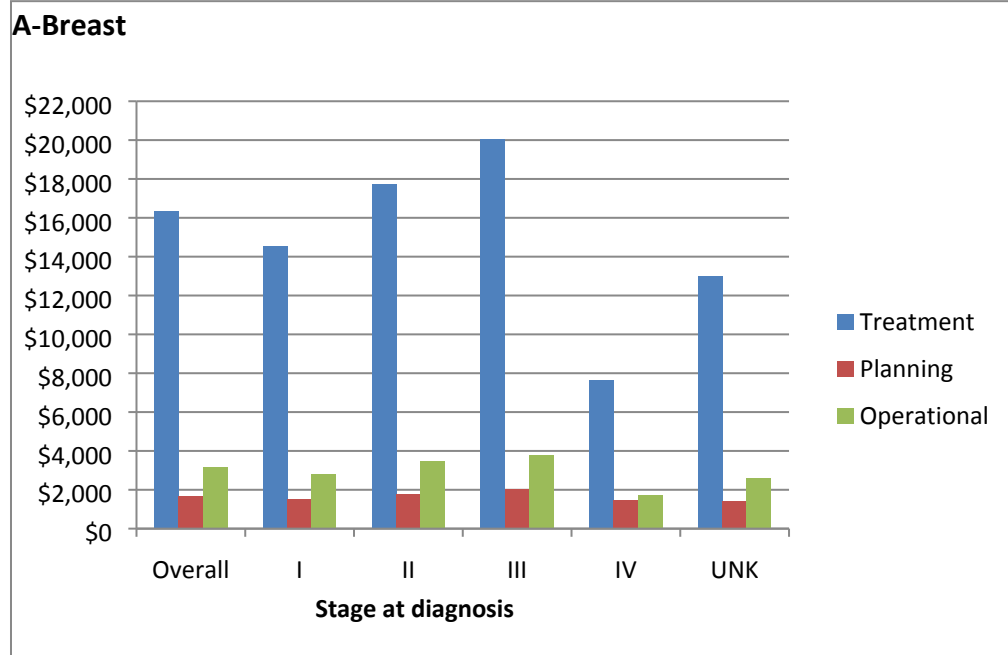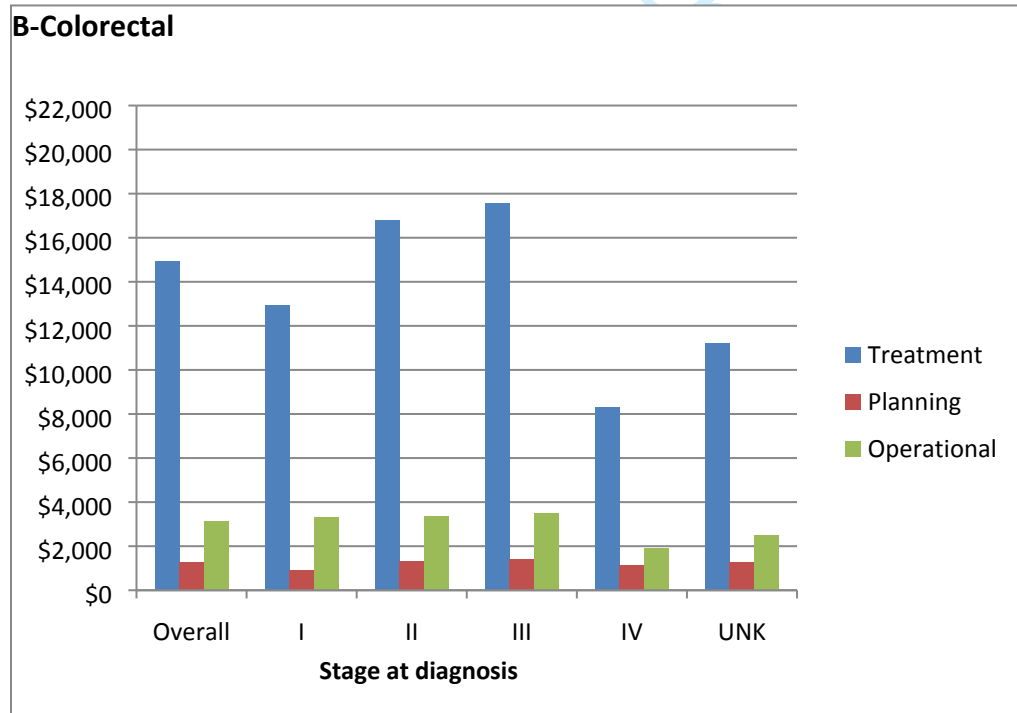

1  
2  
3  
4  
5  
6  
7  
8  
9  
10  
11  
12  
13  
14  
15  
16  
17  
18  
19  
20  
21  
22  
23  
24  
25  
26  
27  
28  
29  
30  
31  
32  
33  
34  
35  
36  
37  
38  
39  
40  
41  
42  
43  
44  
45  
46  
47  
48  
49  
50  
51  
52  
53  
54  
55  
56  
57  
58  
59  
60

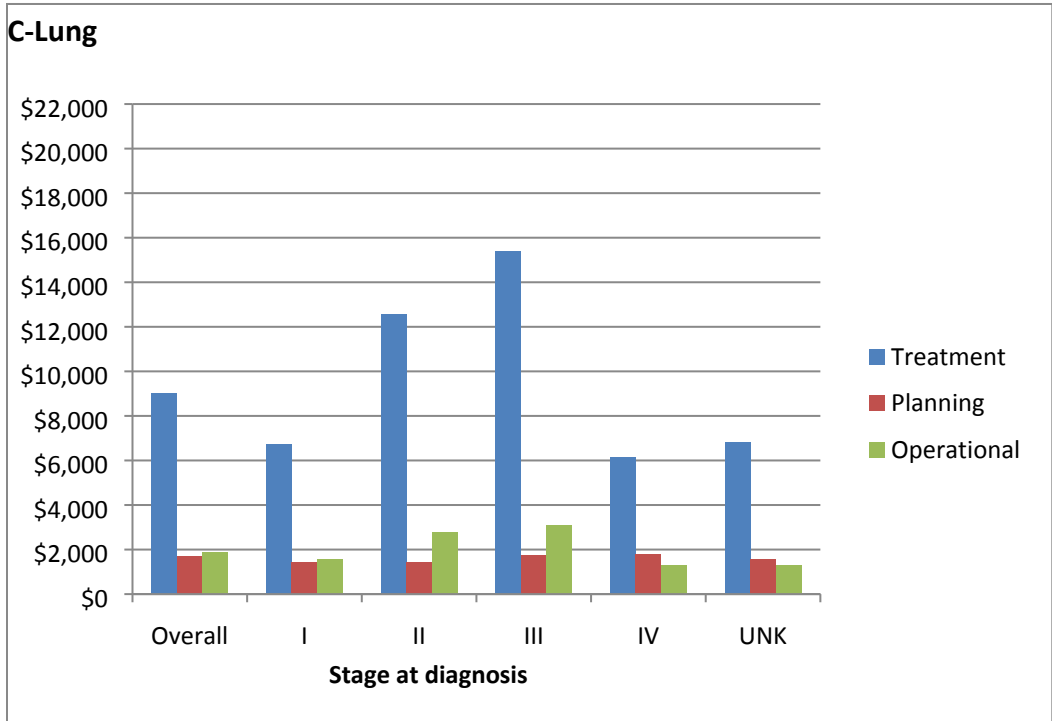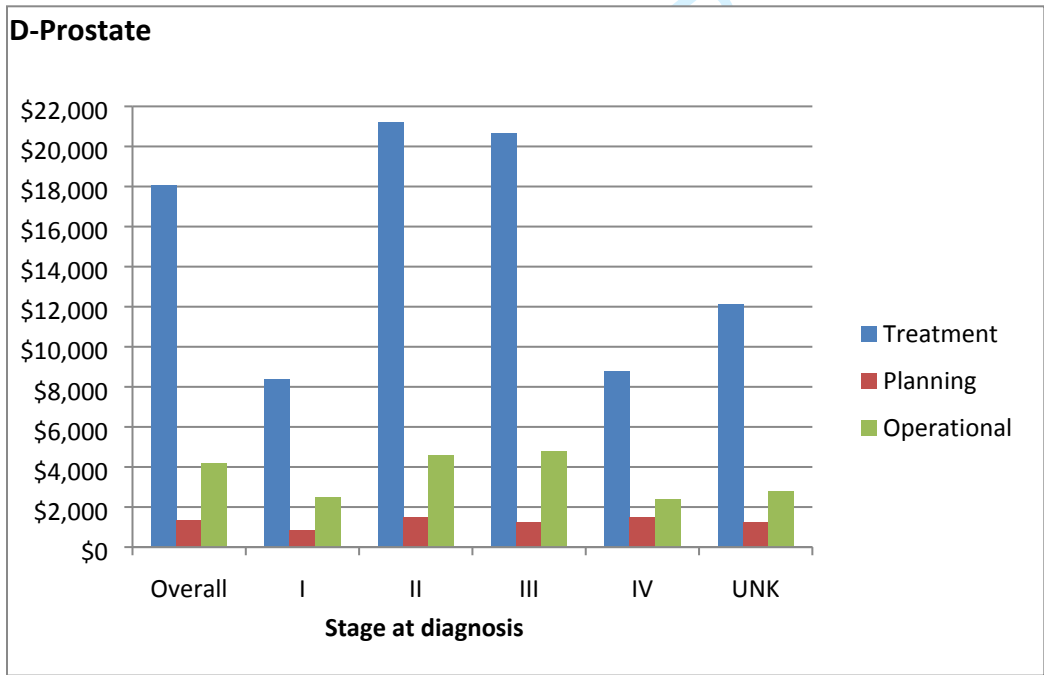



**Appendix 1. Use of cancer-related medication and mean (95% CI in parentheses) cancer-related medication costs in 1 year after diagnosis among cancer patients diagnosed between January 1, 2010 and December 31, 2015, by cancer subtype and cancer stage at the time of diagnosis**

| Cancer site | Cancer subtype             | Measures                            | Overall                    | Stage I                    | Stage II                   | Stage III                  | Stage IV                   | Unknown Stage             |
|-------------|----------------------------|-------------------------------------|----------------------------|----------------------------|----------------------------|----------------------------|----------------------------|---------------------------|
| Breast †    | Hormone Receptor + HER 2 + | No. of patients                     | 4,010                      | 1,219                      | 1,708                      | 838                        | 232                        | 13                        |
|             |                            | No. (%) used chemotherapy           | 3,751 (93.5%)              | 1,089 (89.3%)              | 1,630 (95.4%)              | 813 (97.0%)                | 207 (89.2%)                | 12 (92.3%)                |
|             |                            | Mean (95% CI) of chemotherapy cost* | 30,453<br>(29,828, 31,077) | 28,075<br>(27,036, 29,114) | 29,485<br>(28,677, 30,293) | 32,399<br>(31,177, 33,620) | 43,801<br>(38,327, 49,274) | 15,601<br>(5,305, 25,896) |
|             | Hormone Receptor + HER 2 - | No. of patients                     | 29,241                     | 13,920                     | 10,876                     | 3,441                      | 921                        | 83                        |
|             |                            | No. (%) used chemotherapy           | 21,541 (73.7%)             | 8,324 (59.8%)              | 9,103 (83.7%)              | 3,271 (95.1%)              | 779 (84.6%)                | 64 (77.1%)                |
|             |                            | Mean (95% CI) of chemotherapy cost* | 2,971<br>(2,899, 3,044)    | 1,464<br>(1,381, 1,548)    | 3,568<br>(3,452, 3,683)    | 5,267<br>(5,042, 5,492)    | 2,633<br>(2,151, 3,115)    | 928<br>(655, 1,201)       |
|             | Hormone Receptor - HER 2 + | No. of patients                     | 1,954                      | 498                        | 815                        | 483                        | 151                        | 7                         |
|             |                            | No. (%) used chemotherapy           | 1,807 (92.5%)              | 417 (83.7%)                | 779 (95.6%)                | 465 (96.3%)                | 139 (92.1%)                | 7 (100.0%)                |
|             |                            | Mean (95% CI) of chemotherapy cost* | 32,383<br>(31,463, 33,303) | 27,848<br>(26,276, 29,421) | 31,484<br>(30,345, 32,624) | 33,476<br>(31,768, 35,185) | 47,987<br>(41,800, 54,175) | 19,928<br>(3,604, 36,251) |
|             | Hormone Receptor - HER 2 - | No. of patients                     | 4,249                      | 1,229                      | 2,117                      | 716                        | 180                        | 7                         |
|             |                            | No. (%) used chemotherapy           | 3,872 (91.1%)              | 1,045 (85.0%)              | 1,979 (93.5%)              | 688 (96.1%)                | 154 (85.6%)                | 6 (85.7%)                 |
|             |                            | Mean (95% CI) of chemotherapy cost* | 5,329<br>(5,122, 5,536)    | 4,532<br>(4,174, 4,890)    | 5,496<br>(5,211, 5,781)    | 6,550<br>(5,968, 7,133)    | 3,230<br>(2,456, 4,003)    | 2,915<br>(463, 5,367)     |
| Colorectal  | Colon                      | No. of patients                     | 25,312                     | 5,140                      | 6,754                      | 6,635                      | 4,734                      | 2,049                     |
|             |                            | No. (%) used chemotherapy           | 18,367 (72.6%)             | 2,970 (57.8%)              | 4,619 (68.4%)              | 5,838 (88.0%)              | 3,854 (81.4%)              | 1,086 (53.0%)             |
|             |                            | Mean (95% CI) of chemotherapy cost* | 6,505 (6,348, 6,662)       | 531<br>(422, 640)          | 2,170<br>(2,000, 2,341)    | 10,326<br>(10,043, 10,609) | 11,342<br>(10,887, 11,796) | 3,566<br>(3,037, 4,095)   |
|             | Rectal                     | No. of patients                     | 12,796                     | 3,129                      | 2,370                      | 4,120                      | 2,114                      | 1,063                     |
|             |                            | No. (%) used chemotherapy           | 9,382 (73.3%)              | 1,705 (54.5%)              | 1,802 (76.0%)              | 3,644 (88.4%)              | 1,780 (84.2%)              | 451 (42.4%)               |
|             |                            | Mean (95% CI) of chemotherapy cost* | 6,693<br>(6,500, 6,886)    | 1,226<br>(1,021, 1,431)    | 4,337<br>(4,014, 4,660)    | 8,534<br>(8,251, 8,816)    | 11,659<br>(11,040, 12,277) | 2,305<br>(1,705, 2,906)   |
| Lung        | Non-small                  | No. of patients                     | 30,091                     | 5,959                      | 2,715                      | 5,858                      | 14,531                     | 1,028                     |

1  
2  
3  
4  
5  
6  
7  
8  
9  
10  
11  
12  
13  
14  
15  
16  
17  
18  
19  
20  
21  
22  
23  
24  
25  
26  
27  
28  
29  
30  
31  
32  
33  
34  
35  
36  
37  
38  
39  
40  
41  
42  
43  
44  
45  
46  
47

| Cancer site | Cancer subtype | Measures                            | Overall                             | Stage I              | Stage II             | Stage III            | Stage IV             | Unknown Stage        |                    |
|-------------|----------------|-------------------------------------|-------------------------------------|----------------------|----------------------|----------------------|----------------------|----------------------|--------------------|
|             | cell           | No. (%) used chemotherapy           | 23,831 (79.2%)                      | 4,346 (72.9%)        | 2,340 (86.2%)        | 5,061 (86.4%)        | 11,392 (78.4%)       | 692 (67.3%)          |                    |
|             |                | Mean (95% CI) of chemotherapy cost* | 3,051 (2,955, 3,148)                | 579 (512, 647)       | 1,364 (1,222, 1,506) | 2,325 (2,165, 2,486) | 4,712 (4,535, 4,889) | 2,241 (1,734, 2,749) |                    |
|             |                | Small cell                          | No. of patients                     | 4,718                | 145                  | 140                  | 1,131                | 3,183                | 119                |
|             | Prostate       | Small cell                          | No. (%) used chemotherapy           | 3,842 (81.4%)        | 124 (85.5%)          | 129 (92.1%)          | 989 (87.4%)          | 2,518 (79.1%)        | 82 (68.9%)         |
|             |                |                                     | Mean (95% CI) of chemotherapy cost* | 1,965 (1,882, 2,048) | 1,769 (1,404, 2,134) | 2,334 (1,855, 2,813) | 2,117 (1,960, 2,275) | 1,921 (1,816, 2,027) | 1,181 (835, 1,528) |
|             |                |                                     | No. of patients                     | 45,258               | 10,154               | 22,103               | 5,664                | 4,058                | 3,279              |
| Prostate    | Small cell     | No. (%) used chemotherapy           | 22,599 (49.9%)                      | 3,231 (31.8%)        | 11,763 (53.2%)       | 2,798 (49.4%)        | 3,276 (80.7%)        | 1,531 (46.7%)        |                    |
|             |                | Mean (95% CI) of chemotherapy cost* | 1,211 (1,175, 1,247)                | 268 (239, 296)       | 966 (932, 1,000)     | 825 (763, 888)       | 3,236 (3,060, 3,413) | 1,461 (1,303, 1,620) |                    |

\*: Among those who had a non \$0 chemotherapy medication cost.

†: Results for those with missing Hormone Receptor information or missing HER 2 information were not included.

**Appendix 2. Use of radiation treatment and mean (95% CI in parentheses) radiation treatment costs in 1 year after diagnosis among cancer patients diagnosed between January 1, 2010 and December 31, 2015, by cancer subtype and cancer stage at the time of diagnosis**

| Cancer site | Cancer subtype             | Measures                         | Overall                    | Stage I                    | Stage II                   | Stage III                  | Stage IV                   | Unknown Stage              |
|-------------|----------------------------|----------------------------------|----------------------------|----------------------------|----------------------------|----------------------------|----------------------------|----------------------------|
| Breast†     | Hormone Receptor + HER 2 + | No. of patients                  | 4,010                      | 1,219                      | 1,708                      | 838                        | 232                        | 13                         |
|             |                            | No. (%) used radiation           | 3,430 (85.5%)              | 1,027 (84.2%)              | 1,470 (86.1%)              | 780 (93.1%)                | 147 (63.4%)                | 6 (46.2%)                  |
|             |                            | Mean (95% CI) of radiation cost* | 19,600<br>(19,198, 20,002) | 16,618<br>(15,978, 17,259) | 20,464<br>(19,856, 21,072) | 23,866<br>(23,024, 24,708) | 9,303<br>(7,333, 11,274)   | 16,132<br>(9,049, 23,216)  |
|             | Hormone Receptor + HER 2 - | No. of patients                  | 29,241                     | 13,920                     | 10,876                     | 3,441                      | 921                        | 83                         |
|             |                            | No. (%) used radiation           | 24,532 (83.9%)             | 11,751 (84.4%)             | 9,049 (83.2%)              | 3,095 (89.9%)              | 615 (66.8%)                | 22 (26.5%)                 |
|             |                            | Mean (95% CI) of radiation cost* | 18,343<br>(18,200, 18,485) | 16,438<br>(16,262, 16,615) | 19,724<br>(19,476, 19,972) | 23,744<br>(23,310, 24,178) | 7,548<br>(6,702, 8,394)    | 9,088<br>(4,630, 13,546)   |
|             | Hormone Receptor - HER 2 + | No. of patients                  | 1,954                      | 498                        | 815                        | 483                        | 151                        | 7                          |
|             |                            | No. (%) used radiation           | 1,666 (85.3%)              | 397 (79.7%)                | 718 (88.1%)                | 452 (93.6%)                | 96 (63.6%)                 | 3 (42.9%)                  |
|             |                            | Mean (95% CI) of radiation cost* | 19,872<br>(19,272, 20,473) | 15,689<br>(14,560, 16,818) | 20,697<br>(19,823, 21,571) | 24,149<br>(23,007, 25,291) | 11,089<br>(8,727, 13,451)  | 12,751<br>(284, 25,219)    |
|             | Hormone Receptor - HER 2 - | No. of patients                  | 4,249                      | 1,229                      | 2,117                      | 716                        | 180                        | 7                          |
|             |                            | No. (%) used radiation           | 3,691 (86.9%)              | 1,067 (86.8%)              | 1,844 (87.1%)              | 649 (90.6%)                | 125 (69.4%)                | 6 (85.7%)                  |
|             |                            | Mean (95% CI) of radiation cost* | 19,616<br>(19,228, 20,004) | 17,375<br>(16,759, 17,992) | 20,013<br>(19,463, 20,562) | 23,692<br>(22,739, 24,646) | 11,771<br>(9,107, 14,436)  | 18,563<br>(7,004, 30,122)  |
| Colorectal  | Colon                      | No. of patients                  | 25,312                     | 5,140                      | 6,754                      | 6,635                      | 4,734                      | 2,049                      |
|             |                            | No. (%) used radiation           | 1,722 (6.8%)               | 90 (1.8%)                  | 343 (5.1%)                 | 530 (8.0%)                 | 642 (13.6%)                | 117 (5.7%)                 |
|             |                            | Mean (95% CI) of radiation cost* | 6,508<br>(6,022, 6,994)    | 6,145<br>(3,825, 8,465)    | 8,527<br>(7,284, 9,770)    | 7,799<br>(6,781, 8,818)    | 4,068<br>(3,554, 4,583)    | 8,401<br>(6,460, 10,343)   |
|             | Rectal                     | No. of patients                  | 12,796                     | 3,129                      | 2,370                      | 4,120                      | 2,114                      | 1,063                      |
|             |                            | No. (%) used radiation           | 7,257 (56.7%)              | 962 (30.7%)                | 1,636 (69.0%)              | 3,273 (79.4%)              | 1,235 (58.4%)              | 151 (14.2%)                |
|             |                            | Mean (95% CI) of radiation cost* | 17,235<br>(16,929, 17,540) | 11,030<br>(10,183, 11,878) | 19,260<br>(18,629, 19,891) | 20,643<br>(20,222, 21,063) | 10,719<br>(10,063, 11,375) | 14,236<br>(11,876, 16,596) |
| Lung        | Non-small cell             | No. of patients                  | 30,091                     | 5,959                      | 2,715                      | 5,858                      | 14,531                     | 1,028                      |
|             |                            | No. (%) used radiation           | 19,603 (65.1%)             | 2,208 (37.1%)              | 1,403 (51.7%)              | 4,876 (83.2%)              | 10,750 (74.0%)             | 366 (35.6%)                |

1  
2  
3  
4  
5  
6  
7  
8  
9  
10  
11  
12  
13  
14  
15  
16  
17  
18  
19  
20  
21  
22  
23  
24  
25  
26  
27  
28  
29  
30  
31  
32  
33  
34  
35  
36  
37  
38  
39  
40  
41  
42  
43  
44  
45  
46  
47

| Cancer site | Cancer subtype | Measures                         | Overall                    | Stage I                    | Stage II                   | Stage III                  | Stage IV                  | Unknown Stage             |
|-------------|----------------|----------------------------------|----------------------------|----------------------------|----------------------------|----------------------------|---------------------------|---------------------------|
|             | Small cell     | Mean (95% CI) of radiation cost* | 10,470<br>(10,311, 10,629) | 7,602<br>(7,237, 7,967)    | 12,418<br>(11,715, 13,122) | 17,314<br>(16,903, 17,724) | 7,812<br>(7,660, 7,964)   | 7,202<br>(6,258, 8,145)   |
|             |                | No. of patients                  | 4,718                      | 145                        | 140                        | 1,131                      | 3,183                     | 119                       |
|             |                | No. (%) used radiation           | 3,555 (75.3%)              | 122 (84.1%)                | 124 (88.6%)                | 988 (87.4%)                | 2,255 (70.8%)             | 66 (55.5%)                |
| Prostate    |                | Mean (95% CI) of radiation cost* | 12,733<br>(12,329, 13,138) | 14,855<br>(12,574, 17,135) | 19,603<br>(17,283, 21,923) | 20,143<br>(19,244, 21,043) | 9,002<br>(8,622, 9,381)   | 12,485<br>(9,789, 15,181) |
|             |                | No. of patients                  | 45,258                     | 10,154                     | 22,103                     | 5,664                      | 4,058                     | 3,279                     |
|             |                | No. (%) used radiation           | 23,207 (51.3%)             | 3,228 (31.8%)              | 13,433 (60.8%)             | 3,701 (65.3%)              | 2,478 (61.1%)             | 367 (11.2%)               |
|             |                | Mean (95% CI) of radiation cost* | 16,887<br>(16,648, 17,125) | 6,467<br>(6,006, 6,928)    | 20,543<br>(20,219, 20,867) | 17,765<br>(17,168, 18,362) | 10,264<br>(9,717, 10,812) | 10,564<br>(8,985, 12,142) |

\*: Among those who had a non \$0 radiation treatment cost.

†: Results for those with missing Hormone Receptor information or missing HER 2 information were not included.

**Appendix 3. Use of cancer-related medication and mean (95% CI in parentheses) cancer-related medication costs in 1 year after diagnosis among cancer patients diagnosed between January 1, 2010 and December 31, 2015 and who survived for 2 years or more, by cancer stage at the time of diagnosis.** This analysis was performed to exclude possible end-of-life chemotherapy costs.

| Cancer site | Measures                          | Overall                 | Stage I                 | Stage II                | Stage III                  | Stage IV                   | Unknown Stage           |
|-------------|-----------------------------------|-------------------------|-------------------------|-------------------------|----------------------------|----------------------------|-------------------------|
| Breast      | No. of patients                   | 46,584                  | 20,373                  | 17,765                  | 5,979                      | 1,328                      | 1,139                   |
|             | No. (%) used medication           | 35,560<br>(76.3%)       | 12,793<br>(62.8%)       | 15,316<br>(86.2%)       | 5,700<br>(95.3%)           | 1,149<br>(86.5%)           | 602 (52.9%)             |
|             | Mean (95% CI) of medication cost* | 8,454<br>(8,303, 8,606) | 5,505<br>(5,299, 5,711) | 8,731<br>(8,519, 8,943) | 12,773<br>(12,353, 13,194) | 17,557<br>(15,773, 19,342) | 5,807<br>(4,706, 6,907) |
| Colorectal  | No. of patients                   | 28,137                  | 7,581                   | 7,848                   | 8,725                      | 2,184                      | 1,799                   |
|             | No. (%) used medication           | 20,456<br>(72.7%)       | 4,198<br>(55.4%)        | 5,575<br>(71.0%)        | 7,869<br>(90.2%)           | 1,992<br>(91.2%)           | 822 (45.7%)             |
|             | Mean (95% CI) of medication cost* | 6,917<br>(6,777, 7,057) | 779 (675, 883)          | 2,961<br>(2,791, 3,131) | 10,557<br>(10,333, 10,782) | 17,551<br>(16,940, 18,162) | 4,474<br>(3,811, 5,137) |
| Lung        | No. of patients                   | 11,303                  | 4,905                   | 1,733                   | 2,453                      | 1,889                      | 323                     |
|             | No. (%) used medication           | 8,893<br>(78.7%)        | 3,477<br>(70.9%)        | 1,505<br>(86.8%)        | 2,146<br>(87.5%)           | 1,561<br>(82.6%)           | 204 (63.2%)             |
|             | Mean (95% CI) of                  | 3,117<br>(2,942, 3,292) | 518<br>(448, 588)       | 1,394<br>(1,237, 1,552) | 2,740<br>(2,451, 3,029)    | 11,151<br>(10,398, 11,903) | 2,592<br>(1,473, 3,712) |

1  
2  
3  
4  
5  
6  
7  
8  
9  
10  
11  
12  
13  
14  
15  
16  
17  
18  
19  
20  
21  
22  
23  
24  
25  
26  
27  
28  
29  
30  
31  
32  
33  
34  
35  
36  
37  
38  
39  
40  
41  
42  
43  
44  
45  
46  
47

|                 |                                          |                       |                   |                   |                   |                         |                         |
|-----------------|------------------------------------------|-----------------------|-------------------|-------------------|-------------------|-------------------------|-------------------------|
|                 | <b>medication cost*</b>                  |                       |                   |                   |                   |                         |                         |
| <b>Prostate</b> | <b>No. of patients</b>                   | 42,002                | 9,919             | 21,235            | 5,525             | 2,546                   | 2,777                   |
|                 | <b>No. (%) used medication</b>           | 20,012<br>(47.6%)     | 3,075<br>(31.0%)  | 11,090<br>(52.2%) | 2,691<br>(48.7%)  | 1,946<br>(76.4%)        | 1,210<br>(43.6%)        |
|                 | <b>Mean (95% CI) of medication cost*</b> | 1,031<br>(996, 1,065) | 260<br>(231, 288) | 926<br>(892, 960) | 782<br>(720, 844) | 2,986<br>(2,750, 3,222) | 1,355<br>(1,186, 1,524) |

\*: Among those who had used chemotherapy medication.

Confidential

**Appendix 4. Use of radiation treatment and mean (95% CI in parentheses) radiation treatment costs in 1 year after diagnosis among cancer patients diagnosed between January 1, 2010 and December 31, 2015 and who survived for 2 years or more, by cancer stage at the time of diagnosis**

| Cancer site | Measures                         | Overall                 | Stage I                 | Stage II                | Stage III               | Stage IV                | Unknown Stage           |
|-------------|----------------------------------|-------------------------|-------------------------|-------------------------|-------------------------|-------------------------|-------------------------|
| Breast      | No. of patients                  | 46,584                  | 20,373                  | 17,765                  | 5,979                   | 1,328                   | 1,139                   |
|             | No. (%) used radiation           | 38,721 (83.1%)          | 17,001 (83.4%)          | 14,836 (83.5%)          | 5,485 (91.7%)           | 870 (65.5%)             | 529 (46.4%)             |
|             | Mean (95% CI) of radiation cost* | 18,857 (18,742, 18,973) | 16,504 (16,355, 16,654) | 20,172 (19,978, 20,365) | 24,618 (24,309, 24,927) | 9,155 (8,346, 9,965)    | 13,851 (12,856, 14,846) |
| Colorectal  | No. of patients                  | 28,137                  | 7,581                   | 7,848                   | 8,725                   | 2,184                   | 1,799                   |
|             | No. (%) used radiation           | 6,673 (23.7%)           | 947 (12.5%)             | 1,672 (21.3%)           | 3,199 (36.7%)           | 708 (32.4%)             | 147 (8.2%)              |
|             | Mean (95% CI) of radiation cost* | 17,229 (16,904, 17,554) | 10,761 (9,902, 11,620)  | 18,227 (17,585, 18,869) | 19,857 (19,415, 20,298) | 11,866 (10,918, 12,814) | 16,204 (13,811, 18,597) |
| Lung        | No. of patients                  | 11,303                  | 4,905                   | 1,733                   | 2,453                   | 1,889                   | 323                     |
|             | No. (%) used radiation           | 5,866 (51.9%)           | 1,554 (31.7%)           | 748 (43.2%)             | 2,063 (84.1%)           | 1,418 (75.1%)           | 83 (25.7%)              |
|             | Mean (95% CI) of radiation cost* | 14,297 (13,947, 14,647) | 7,715 (7,262, 8,167)    | 12,983 (11,957, 14,008) | 22,227 (21,609, 22,844) | 10,881 (10,318, 11,444) | 10,662 (8,136, 13,188)  |
| Prostate    | No. of patients                  | 42,002                  | 9,919                   | 21,235                  | 5,525                   | 2,546                   | 2,777                   |

1  
2  
3  
4  
5  
6  
7  
8  
9  
10  
11  
12  
13  
14  
15  
16  
17  
18  
19  
20  
21  
22  
23  
24  
25  
26  
27  
28  
29  
30  
31  
32  
33  
34  
35  
36  
37  
38  
39  
40  
41  
42  
43  
44  
45  
46  
47

|  |                                         |                               |                         |                               |                               |                               |                               |
|--|-----------------------------------------|-------------------------------|-------------------------|-------------------------------|-------------------------------|-------------------------------|-------------------------------|
|  | <b>No. (%) used radiation</b>           | 21,768<br>(51.8%)             | 3,184 (32.1%)           | 13,056<br>(61.5%)             | 3,625 (65.6%)                 | 1,613 (63.4%)                 | 290 (10.4%)                   |
|  | <b>Mean (95% CI) of radiation cost*</b> | 17,397<br>(17,148,<br>17,646) | 6,466<br>(6,001, 6,930) | 20,651<br>(20,322,<br>20,979) | 17,836<br>(17,233,<br>18,439) | 12,596<br>(11,822,<br>13,371) | 12,123<br>(10,237,<br>14,008) |

\*: Among those who had a non \$0 radiation cost.

Confidential
